1 **Ex Vivo Validation of Six FDA-Approved Non-Receptor Tyrosine Kinase**  
2 **Inhibitors (NRTKIs) as Antivirals to Pandemic and Seasonal Influenza A**  
3 **Viruses**

4  
5 Robert Meineke<sup>1</sup>, Sonja Stelz<sup>1</sup>, Maximilian Busch<sup>1</sup>, Christopher Werlein<sup>2</sup>, Mark Kühnel<sup>2,3</sup>,  
6 Danny Jonigk<sup>2,3</sup>, Guus F. Rimmelzwaan<sup>1</sup>, Husni Elbahesh<sup>1,✉</sup>

7  
8  
9 <sup>1</sup> Research Center for Emerging Infections and Zoonoses (RIZ), University of Veterinary  
10 Medicine (TiHo), Bünteweg 17, 30559 Hannover, Germany

11 <sup>2</sup> Department of Pathology, Hannover Medical School (MHH), Carl-Neuberg-Straße 1,  
12 30625 Hannover, Germany

13 <sup>3</sup> Member of the German Center for Lung Research (DZL), Biomedical Research in  
14 Endstage and Obstructive Lung Disease Hannover (BREATH)

15  
16  
17 **Running Title: NRTKIs are effective influenza antivirals**

18  
19  
20  
21  
22 ✉ **Correspondence:** Husni.Elbahesh@tiho-hannover.de

23

24 **ABSTRACT**

25 Influenza viruses are important respiratory pathogens that cause substantial morbidity  
26 and mortality annually. In addition to seasonal influenza outbreaks, new emerging  
27 influenza A viruses (IAV) can cause pandemic influenza outbreaks. Apart from effective  
28 vaccines, there is a need for better treatment options to combat infections with these  
29 viruses when vaccines are not available or show reduced efficacy (e.g., in  
30 immunocompromised patients). The limited range of licensed antiviral drugs and  
31 emergence of drug-resistance mutations highlight the need for novel intervention  
32 strategies like host-targeted antivirals. Repurposing FDA-approved kinase inhibitors may  
33 offer a fast-track for a new generation of host-targeted antivirals. Small molecule kinase  
34 inhibitors (SMKIs) can inhibit replication of viruses and improve survival *in vivo*; however,  
35 no SMKI has been approved for clinical use against IAV infections. In the present study,  
36 we tested eight non-receptor tyrosine kinase-inhibitors (NRTKIs) used to treat cancer and  
37 autoimmune diseases for their antiviral potential. Six of those potently inhibited virus  
38 replication ( $\geq 1,000$ -fold) in A549 cells infected with either A(H1N1)pdm09 or seasonal  
39 A(H3N2) strains. These compounds were validated in a biologically relevant *ex vivo*  
40 model of human precision-cut lung slices (hPCLS) to provide proof of principle and show  
41 efficacy against contemporary seasonal and pandemic IAVs. We identified the steps of  
42 the virus infection cycle affected by these inhibitors and assessed the effect of these  
43 NRTKIs on the host response. Considering their established safety profiles, our studies  
44 show that the use of these NRTKI shows promise and warrants further development as  
45 an alternative strategy to treat influenza virus infections.

46

## 47 INTRODUCTION

48 Influenza viruses are an important cause of respiratory tract infections in humans and  
49 are responsible for substantial annual morbidity and mortality, especially in individuals at  
50 high risk, like older adults or immunocompromised patients. The most important  
51 preventive measure to protect humans from influenza virus infections is vaccination.  
52 Currently used vaccines mainly aim at the induction of virus neutralizing antibodies to the  
53 viral hemagglutinin (HA). For vaccines to be effective they need to antigenically match  
54 the circulating strains.<sup>1-3</sup> Due to a lack of proof-reading activity of their RNA-dependent  
55 RNA polymerase (RdRp), influenza viruses can accumulate mutations that lead to  
56 antigenic drift and allow them to evade recognition by virus-neutralizing (VN) antibodies  
57 induced by previous infections or vaccinations. These antigenic changes also necessitate  
58 annual update of influenza vaccines against seasonal influenza<sup>4</sup>. Moreover, emergence  
59 of novel influenza viruses that arise through genetic reassortment after interspecies  
60 transmission. Emergence of these viruses in human populations that largely lack VN  
61 antibodies can result in pandemic outbreaks. At the early stages of a pandemic, effective  
62 vaccines are not readily available, as was the case during the pandemic of 2009 caused  
63 by swine-origin A(H1N1) influenza A viruses (IAVs).

64 In the absence of efficacious vaccines, virus-targeted antivirals can offer some  
65 protection if administered within the therapeutic window. Until recently, influenza antivirals  
66 were comprised of two classes, Adamantanes that target the viral M2 ion channel protein  
67 and neuraminidase inhibitors (NAI). Due to almost ubiquitous resistance found in currently  
68 circulating strains, Adamantanes have been rendered ineffective and are no longer used  
69 in clinical practice<sup>5</sup>. The levels of currently circulating viruses that carry resistance

70 mutations to NAIs (such as oseltamivir) isolated from otherwise healthy individuals is only  
71 ~4-5%<sup>6</sup>. A more recent strategy has been to target the influenza polymerase proteins,  
72 with Favipiravir (T705), Baloxavir and Pimodivir targeting the viral PB1, PA and PB2  
73 polymerase subunit proteins, respectively being the most widely used antivirals. All seem  
74 to inhibit viruses that are resistant to Adamantanes and NAIs<sup>7,8</sup>. In 2018, Baloxavir was  
75 approved for the treatment of acute and “uncomplicated” influenza infections in the United  
76 States<sup>9,10</sup>. Surprisingly, Uehra et al. found that even in otherwise healthy adults and  
77 adolescents the emergence of strains carrying Baloxavir resistance mutations was as  
78 high as ~10% and could potentially be higher in immunocompromised patients<sup>11,12</sup>.

79 The sustained circulation of virus variants resistant to current antivirals and the low  
80 genetic barrier to achieve resistance highlight the need for host-targeted therapeutics;  
81 that do not suffer from these limitations. Given that all viruses rely on host-cellular  
82 machinery for replication at every step of their life cycle, several host proteins have been  
83 shown to be required for efficient viral replication and pathogenesis<sup>13-17</sup>. Host kinases  
84 link a myriad of signaling pathways used by viruses; and as such, they offer attractive  
85 targets for potential host-directed therapeutics against infections by several viruses  
86 including influenza viruses<sup>13,14,18</sup>. Host kinases catalyse phosphorylation of lipids or  
87 proteins, at either tyrosine or serine/threonine residues that not only serves to relay and  
88 amplify cell signaling, but phosphorylation can also lead to conformational changes in  
89 proteins that facilitate protein-protein interactions<sup>19,20</sup>.

90 Although the human kinome consists of more than 550 kinases, currently available  
91 kinase inhibitors only target ~10% of kinases and are primarily used to treat cancers<sup>21-</sup>  
92 <sup>25</sup>. To date, only 62 small-molecule kinase inhibitors (SMKIs) have been FDA-approved

93 and the majority of these target tyrosine kinases <sup>26</sup>. Non-receptor tyrosine kinases  
94 (NRTKs) are cytoplasmic or membrane-anchored kinases that closely associate with  
95 cellular receptors or receptor complexes to mediate outside-in signaling <sup>26</sup>. NRTKs like  
96 most kinases contain a catalytic kinase domain, as well as several protein-protein  
97 interaction motifs (e.g., SH2, SH3, PH domains, etc.) necessary to relay cell signals.  
98 NRTKs include Abl, FAK, JAK, Src and BTK, all of which have been reported to play a  
99 role in IAV infections. Previous studies have demonstrated that NRTK inhibitors (NRTKIs)  
100 can modulate pro- and anti-viral signaling *in vitro* and result in reduced viral pathogenesis  
101 and increased survival *in vivo* <sup>13,16,27-32</sup>. However, no NRTKIs or SMKIs have been  
102 approved for clinical use against influenza. In the present study, we characterized the  
103 effect of eight currently available and FDA-approved NRTKIs on IAV replication, six of  
104 which were validated using a biologically relevant *ex vivo* model of human precision-cut  
105 lung slices (hPCLS). hPCLS maintain near-native structural integrity of lung tissues that  
106 allow complex and 3D cell-cell interactions of epithelial cells, mesenchymal tissue as well  
107 as the vascular compartment; thereby, offering an advantage over cultured epithelial  
108 monolayers <sup>33-35</sup>. We also identify which steps of the virus infection cycle are affected by  
109 specific NRTKIs; thereby providing insights into potential mechanisms of action in the  
110 context of influenza virus infections.

111

## 112 **RESULTS**

### 113 **NTRKI treatment inhibits IAV replication *in vitro***

114 To identify non-toxic concentrations of our inhibitors, we used the CellTiter-Glo (CTG)  
115 assay in which cell-viability is based on ATP content in healthy cells. We identified

116 concentrations that resulted in cell viability  $\geq 90\%$  relative to mock-treated cells (cells  
117 treated with 0.1% DMSO). The highest concentration with  $\geq 90\%$  relative viability was  
118 defined as the 1x concentration ( $[1x]_{\max}$ ) (**Fig. 1/Table 1**).

119 Next, we determined the effect of eight NRTKIs on influenza A virus replication. A549  
120 cells were infected with either pandemic A(H1N1)pdm09 strain A/Netherlands/602/09  
121 (NL09) or seasonal A(H3N2) strain A/Netherlands/241/11 (NL11) at a multiplicity of  
122 infection (MOI) of 1 in the presence or absence of  $[1x, 0.5x$  and  $0.25x]_{\max}$  concentrations  
123 of the respective inhibitors following inoculation. Culture supernatants were collected at  
124 2, 24, 48, and 72 hours post infection (hpi) and virus titers were determined by median  
125 tissue culture infectious dose (TCID<sub>50</sub>) assay. We observed a dose-dependent reduction  
126 of viral titers by six of the eight inhibitors with at least one of the concentrations ranging  
127 from 2- to 1,000-fold (**Fig. 2A**) reduction of virus titers. As visualized by the heatmap (**Fig.**  
128 **2B**), there was variability in both magnitude and duration of the reduction of virus titers,  
129 and in general, the effect was more pronounced in NL11 (H3N2) infected cells than NL09  
130 (pH1N1). Although we observed only a transient reduction at 24 hpi with Tofacitinib (TF)  
131 (JAK1/2/3 inhibitor)<sup>36</sup>, we did not observe any significant reduction with Ruxolitinib (RX)  
132 (JAK1/2 inhibitor)<sup>37</sup>. The highest and most sustained level of reduction was observed with  
133 Nilotinib (NI) (Abl/PDGFRa inhibitor)<sup>38,39</sup>:  $>1,000$ -fold ( $3\text{-log}_{10}$ ) reduction. Bosutinib (BO)  
134 (Abl/Src/Btk inhibitor)<sup>40,41</sup> and Saracatinib (SA) (Src inhibitor)<sup>42</sup> also showed marked  
135 inhibition (SA  $\sim 5$ - to 25-fold; BO  $\sim 10$ - to 1,000-fold). Acalabrutinib (AC) (Btk inhibitor)<sup>43,44</sup>  
136 had very little effect on NL09 replication but showed a greater and more sustained  
137 inhibition (5- to 25-fold) of NL11 replication at the higher concentrations (0.25 and 0.5  
138  $\mu\text{M}$ ). Similarly, Ibrutinib (IB) (Btk/EGFR inhibitor)<sup>45,46</sup> had little to no effect on NL09

139 replication but a more appreciable and sustained (5- to 100-fold) reduction, especially at  
140 the highest concentration used (0.5  $\mu$ M) of NL11 replication. Defactinib (DF) (FAK/Pyk2  
141 inhibitor)<sup>47</sup> treatment resulted in robust reduction in viral titers (10- to 1,000-fold) in both  
142 NL09 and NL11 at the higher concentrations (2.5 and 5.0  $\mu$ M). In NL09 infected cells, the  
143 reduction was more robust at earlier time-points (24 and 48 hpi), but in NL11 infected  
144 cells a larger reduction was observed at 24 and 72 hpi than at 48 hpi.

145

### 146 **NRTKIs affect IAV infectivity and cell viability during IAV infection**

147 Host-targeted inhibitors can influence virus yield by affecting infectivity through effects  
148 on viral entry, RNA replication, increased host antiviral responses as well as impacting  
149 the viability of infected cells. To assess the effect of NRTKIs on viral infectivity and cellular  
150 viability, we used immunofluorescence microscopy to determine the number of infected  
151 cells as well as the total number of cells. A549 cells were infected with either NL09 or  
152 NL11 (MOI=1) in the presence of NRTKIs [0.5x]<sub>max</sub>, fixed at 48 hpi and stained to detect  
153 virus and nuclei (**Fig. 3A**). Surprisingly, treatment with most inhibitors resulted in a  
154 significant increase in infectivity despite the reduction in viral titers observed in **Fig. 2**. We  
155 observed robust increases in relative infectivity in cells treated with TF (NL09=217%,  
156 NL11=112%), RX (NL09=203%, NL11=116%) and DF (NL09=180%, NL11=139%). We  
157 only observed a marginal increase in relative infectivity (~105%) in cells treated with either  
158 BO or NI in both NL09- and NL11-infected cells. We observed a marked decrease in  
159 relative infectivity in cells treated with AC (NL09=78%, NL11=74%) and SA (~90% for  
160 both NL09 and NL11). Interestingly, we observed opposite effects on NL09 (increased)-

161 and NL11 (decreased)-infected cells following treatment with IB (NL09=116% vs  
162 NL11=91%) (**Fig. 3B**).

163 Next, we determined whether the reduction in titers was the result of reduced cell  
164 viability using the CellTiter Glo assay described above. Although at the NRTKI  
165 concentrations used  $[0.5x]_{\max}$  we observed less than 5% cytotoxicity in mock-infected  
166 cells, IAV-infection led to synergistic cytotoxicity and decreased relative viability when  
167 treated with TF (NL09=40%, NL11=63%), RX (NL09=66%, NL11=89%) or DF  
168 (NL09=84%, NL11=92%). However, cell viability was increased by treatment of IAV-  
169 infected cells with AC (NL09=112%, NL11=109%), IB (NL09=102%, NL11=109%) BO  
170 (NL09=111%, NL11=114%), NI (NL09=110%, NL11=110%) or SA (NL09=150%,  
171 NL11=127%) (**Fig. 3B**). Taken together, our data suggest that decreased infectivity or  
172 cell viability alone do not account for the NRTKI induced reduction in viral titers we  
173 observed.

174

### 175 **The antiviral effect of NRTKIs is MOI-independent**

176 Given the viability data and the limited reduction in viral titers above, we excluded RX  
177 and TF from further analyses and focused on the remaining six NRTKIs for further  
178 investigation. We assessed whether the inhibitory effects of NRTKIs we observed were  
179 dependent on the infectious dose used. We infected A549 cells with either a high MOI  
180 (MOI=3) or a low MOI (MOI=0.01) in the presence or absence of NRTKIs  $[0.5x]_{\max}$ .  
181 Culture supernatants were collected at 2, 24, 48, and 72 hpi and virus titers were  
182 determined by TCID<sub>50</sub> assay. As we previously observed, the effect on the seasonal H3N2  
183 (NL11) strain was more pronounced compared to that on the pandemic H1N1 (NL09)



184 strain; presumably due to the faster growth kinetics of NL11 compared to NL09. However,  
185 similarly to cells infected at MOI=1 (**Fig. 2**), NRTKI treatment of cells infected at either  
186 high (3) or low (0.01) MOI resulted in viral titer reductions of at least 10-fold ( $1\text{-log}_{10}$ ) (**Fig.**  
187 **4**). Treatment with either DF, BO or NI had a larger impact on early (24 hpi) viral  
188 replication, especially in NL11 infected cells. And although peak titers of untreated cells  
189 infected with NL11 were similar at either MOI, cells infected at MOI=0.1 exhibited the  
190 greatest reduction of  $\sim 1,000$ -fold ( $3\text{-log}_{10}$ ). Although AC, IB and SA treatment had less of  
191 an impact on viral titers than DF, BO or NI, viral titer reductions were still up to 100-fold  
192 ( $2\text{-log}_{10}$ ) (**Fig. 4**).

193

#### 194 **Human PCLS support robust IAV infection and confirm inhibitory effect of NRTKI** 195 **treatment**

196 We utilized human precision-cut lung slices (hPCLS) as a biologically relevant *ex vivo*  
197 model that more faithfully represents lung tissues than either 2D monolayer cultures or  
198 3D air-liquid-interface (ALI) cultures<sup>33,34</sup>. Following hPCLS preparation, they were in  
199 culture for up to 4 weeks; no gross alterations in cell type or morphology were observed  
200 and cilia beating was observed in all used hPCLS (8 donors; n=24). We first sought to  
201 identify an infectious dose to synchronize peak titers in hPCLS infected with either NL09  
202 or NL11 as these two strains have different replication kinetics *in vitro*. hPCLS were  
203 infected with  $10^4$ ,  $10^5$ , or  $10^6$  TCID<sub>50</sub> / 200  $\mu$ L with either NL09 or NL11. To limit donor-  
204 heterogeneity effects, we used hPCLS from 8 donors (n=24/virus). Culture supernatants  
205 were collected and replenished at 2, 16, 24, 48, 72, 96, and 144 hpi and virus titers were  
206 determined by TCID<sub>50</sub> assay using the collected supernatants. Interestingly, the  $10^6$  dose

207 yielded maximal titers that were lower than the other doses and were achieved by 24 hpi  
208 with either strain. However, the highest peak titers were achieved at 48 hpi following  
209 infection with either  $10^4$  or  $10^5$  doses of NL11, but only in the  $10^5$  dose of NL09 (**Fig. 5A**).  
210 Based on these results the  $10^5$  dose was used in all our subsequent hPCLS infections.

211 Next, we determined the tolerability of hPCLS to our NRTKIs candidates. hPCLS were  
212 treated with either the  $[1x \text{ or } 10x]_{\max}$  (1x is highest non-toxic NRTKI concentration defined  
213 using A549 cells). Culture supernatants were collected and replenished at 24, 48, 72, 96,  
214 and 144 h. Lactate dehydrogenase (LDH) release into the culture supernatant due to loss  
215 of plasma membrane integrity is an indicator for cytotoxicity. Using a bioluminescence  
216 based LDH detection assay (LDH-Glo Cytotoxicity Assay), we quantified LDH released  
217 into the collected supernatants following NRTKI treatment. As a positive control for  
218 cytotoxicity, hPCLS were treated with 0.1% Triton-X 100; DMSO-treated hPCLS were  
219 used as a vehicle control (**Fig. 5B**). Our cytotoxicity cut-off was 20% of the positive control  
220 treatment; none of the NRTKIs surpassed this cut-off at  $[1x]_{\max}$ . However,  $[10x]_{\max}$   
221 concentrations of DF (50  $\mu\text{M}$ ), BO (50  $\mu\text{M}$ ) and SA (1.25  $\mu\text{M}$ ) showed significantly higher  
222 cytotoxicity that was above the relative 20%-cutoff; therefore, only the 1x concentrations  
223 of these NRTKIs were used in subsequent hPCLS experiments.

224

## 225 **NRTKIs inhibit *ex vivo* IAV infections**

226 Based on our *in vitro* data, we tested six NRTKIs (AC, BO, DF, IB, NI and SA) for their  
227 antiviral potential. hPCLS from 3 donors (n=6/virus/condition) were infected with  $10^5$   
228 TCID<sub>50</sub> of either NL09 or NL11 and then treated with NRTKIs (DF 5 $\mu\text{M}$ ; AC 5 $\mu\text{M}$ ; IB 5 $\mu\text{M}$ ;  
229 BO 5 $\mu\text{M}$ ; NI 10 $\mu\text{M}$ ; SA 0.125 $\mu\text{M}$ ). Culture supernatants were collected and replenished

230 from the same wells at 2, 12, 24, 48, 72, and 120 hpi and virus titers were determined by  
231 TCID<sub>50</sub> assay. We observed a significant and robust reduction in viral titers of at least 10-  
232 fold or 1-log<sub>10</sub> (DF treatment) to more than 1,000-fold or 3-log<sub>10</sub> (IB and NI treatments)  
233 using all the NRTKIs (**Fig. 5C**). Moreover, unlike what we observed in A549 cells, NRTKI-  
234 mediated IAV inhibition was observed as early as 12 hpi and maintained at 120 hpi;  
235 beyond the times when peak titers were achieved (48-72 hpi) (**Fig. 5C**).

236 Next, we assessed the effect of NRTKI treatment on viral spread and associated  
237 damage to the epithelium. Considering we did not observe significant differences in titer  
238 reductions between NL09 and NL11, only data for NL11 is shown (**Fig. 5D**). At 120 hpi,  
239 mock- and IAV-infected hPCLS (n=3/virus/condition) were fixed and paraffin-embedded.  
240 Tissue sections (2 μm thick) were cut, stained and immunoprobed. H&E staining indicated  
241 that no gross alterations in cell composition or the epithelium were observed in mock-  
242 infected cells indicating viability of hPCLS. Typical morphological changes associated  
243 with IAV infections were observed. Using consecutive sections from those H&E stained,  
244 we detected the viral spread using antibodies to IAV-NP (**Fig. 5D**). We observed specific  
245 staining of viral antigen in all observed cell-types including type I/II pneumocytes and  
246 endothelial cells. Additionally, staining intensity and quantity was reduced in NRTKI  
247 treated hPCLS compared to untreated hPCLS.

248 We carried out semiquantitative analysis of the acquired images to compare the effect  
249 of the inhibitors on viral spread in hPCLS with variable tissue density. IAV-NP signal was  
250 normalized to H&E staining of the respective regions in consecutive tissue section.  
251 Treatment with DF, AC, BO and SA significantly reduced the infectivity by > 50%, whereas  
252 treatment with IB and NI had limited effects on infectivity (**Fig. 5E**).

253

## 254 **Stability of NRTKI inhibition**

255 Host-directed antivirals/therapeutics are thought to have a higher barrier of resistance  
256 than their virus-targeted counterparts. To determine the stability of the antiviral effect of  
257 our NRTKIs, we phenotypically assessed the possibility of the emergence of resistant  
258 escape variants <sup>48,49</sup>. We passaged both NL09 and NL11 viruses (MOI=0.001) in the  
259 presence of NRTKIs [ $1x$ ]<sub>max</sub> in MDCK cells for 5 passages. Untreated virus stocks were  
260 also passaged as a control. At each passage, virus supernatant was quantified and used  
261 to inoculate the next passage at MOI=0.001 again. In untreated passages, the virus titers  
262 for both NL09 and NL11 was similar from passages 1 to 5 but were significantly lower in  
263 all treated passages (**Fig. 6A**); the reduction was comparable to what we originally  
264 observed in A549 cells. The viral titers were stable at all passages indicating that no  
265 resistance mutations were acquired. To rule out the possibility that the NRTKIs directly  
266 interact with the virion and inhibit its attachment or entry, we pre-incubated virus stocks  
267 with NRTKIs [ $1x$ ]<sub>max</sub> for 2 h then diluted the virus stocks 1:1000 to minimize the effects on  
268 host cells, and infected A549 cells. At 72 hpi, culture supernatants were collected and  
269 virus titrated by TCID<sub>50</sub> assay. As expected, pre-treatment of virus with NRTKIs had no  
270 effect on viral titers, indicating that the observed effects are due to host-cell effects (**Fig.**  
271 **6B**).

272

## 273 **Selected NRTKIs inhibit viral entry**

274 Kinases regulate every step of the infection cycle and a single kinase can affect  
275 multiple steps <sup>28,29</sup>. We first assessed whether our NRTKIs impaired viral entry. A549 cells

276 were pretreated for 2 h, then chilled on ice for 15 min and infected at a high MOI (MOI=10)  
277 on ice for 30 min to synchronize the infection and allow binding of the virus to cell surface  
278 receptors but not trafficking of virions. Unbound and non-internalized virus was washed  
279 away with room temperature PBS. Cells were then incubated with prewarmed infection  
280 media in the presence or absence of NRTKIs. At 0.5 hpi, cells were fixed, stained to detect  
281 viral NP, F-actin and nuclei and analyzed by confocal microscopy. We observed  
282 significant retention at the membrane and periphery of the cell following DF and IB  
283 treatment (**Fig. 7**). Surprisingly, no virus was detected in response to BO treatment and  
284 the F-actin network was not detectable. Given the sustained viability of BO-treated cells,  
285 it is likely that the altered actin dynamics are well tolerated. No significant changes were  
286 detectable in AC, NI or SA treated cells suggesting these inhibitors did not affect viral  
287 entry under our tested conditions (**Fig. 7**).

288

### 289 **NRTKIs exert differential effects on IAV polymerase activity**

290 Next, we assessed the effect of our NRTKIs on viral RNA replication using the pPOLI-  
291 358-FFLuc reporter plasmid, which encodes a firefly luciferase gene under control of the  
292 viral nucleoprotein (NP) promoter. In this system, luciferase activity is a surrogate for viral  
293 polymerase activity<sup>50-52</sup>. A549 cells were transfected with pPOLI-358-FFLuc and  
294 pmaxGFP plasmids (transfection control). At 24 hpt, cells were either infected with NL09  
295 or NL11 at MOI=1 in the presence or absence of indicated NRTKIs at either [0.5x or  
296 1x]<sub>max</sub>. At 48 h post-transfection (hpt) (~24 hpi), luciferase activity was measured,  
297 normalized to GFP expression (MFI) and represented as relative of untreated infected  
298 cells. We observed a significant reduction in polymerase reporter activity in response to

299 AC (NL11 only), IB (NL09 only), BO, NI and SA (NL11 only) (**Fig. 8A, left panel**). Although  
300 the magnitude of reduction was higher in NL09-infected than NL11-infected cells, a  
301 significant reduction was more readily observed in NL11 infected cells at a lower NRTKI  
302 concentration compared to NL09 infected cells. DF also reduced reporter activity  
303 (NL09=20%, NL11=13%), however this reduction was not statistically significant. At 24  
304 hpi, a 3-fold increase in reporter activity could be observed in untreated NL11-infected  
305 cells over untreated NL09-infected cells; this is in-line with faster replication kinetics of  
306 NL11 compared to NL09 (**Fig. 8A, right panel**).

307 To better dissect the direct effect on viral RNA replication in the absence of  
308 confounding factors due to NRTKI influences on viral entry and host responses, we  
309 utilized an established minigenome system. A549 cells were transfected with pPOLI-358-  
310 Ffluc and pmaxGFP plasmids and co-transfected with either NL09 or NL03-minigenome  
311 plasmids that encode the viral NP, PA, PB1 and PB2 replication complex proteins. At 6  
312 hpt, the indicated NRTKIs were added to the medium at either [0.5x or 1x]<sub>max</sub>. At 30 hpt  
313 (24 h of treatment), luciferase activity was measured, normalized and represented as  
314 above. In this context, AC (NL09 only), IB, NI and SA treatments significantly reduced  
315 polymerase activity (**Fig. 8B**). In contrast to what we observed in infected cells, the  
316 magnitude of reduction in polymerase activity was comparable in NL09- and NL11-  
317 minigenome transfected cells. Interestingly, polymerase activity was significantly higher  
318 in untreated H1N1 (NL09) than H3N2 (NL03) minigenome-transfected cells.

319

320 **NRTKIs do not affect innate immune responses during IAV infections**

321 Given that our NRTKIs reduced viral titers by affecting either viral entry or replication,  
322 we speculate whether these effects were coupled to altered innate immune signaling.  
323 Activation of STAT3 by IFN type-I, -II, and -III as well as by interleukins results in  
324 phosphorylation of STAT3 at Y705. We assessed the level of pSTAT3 (pY705) in A549  
325 cells infected with either NL09 or NL11 (MOI=1) in the presence or absence of NRTKIs  
326 at  $[1x]_{max}$ . At 18 and 48 hpi, total proteins were isolated from whole cell lysates, separated  
327 by SDS-PAGE and analyzed by immunoblotting. We observed a decrease in the relative  
328 pSTAT3/total STAT3 ratio in untreated NL09-infected cells at 18 and 48 hpi (**Fig. 9A**)  
329 compared to mock-infected cells (18 h = 159%, 48 h = 225%). This reduction was less  
330 striking in NL11-infected cells (**Fig. 9B**). Only DF treatment resulted in a significant  
331 reduction of pSTAT3 relative to untreated infected cells (NL09 = 5% to 8%, NL11 = 5%  
332 to 14% of untreated). None of the other NRTKIs showed a significant effect.

333 Phosphorylation of NFkB p65 (pNFkB) at S536 results in activation of the NFkB  
334 pathway. We did not detect an increase in the relative pNFkB/total NFkB ratio in NL09-  
335 infected cells compared to mock-infected cells at either 18 or 48 hpi following treatment  
336 with any of the NRTKIs (**Fig. 10A**). In contrast, we observed a slight increase in the  
337 pNFkB/total NFkB ratio in untreated NL11-infected cells at 18 and 48 hpi (**Fig. 10B**)  
338 compared to mock-infected cells (18 h = 75%, 48 h = 89%). Although we did observe a  
339 reduction in NFkB activation following DF treatment of NL11-infected cells (18 h = 64%,  
340 48 h = 68% of untreated), this reduction was not statistically significant. We next  
341 confirmed that NFkB signaling is not impaired in our system. Mock-infected cells were  
342 treated with high-molecular weight poly(IC), a synthetic dsRNA, at either 50 or 200 ng/ml.  
343 Following infection of cells with NL09 or NL11 (MOI=1), cells were treated with 200 ng/ml

344 poly(IC). At 18 and 48 hpi, total proteins were isolated from whole cell lysate, separated  
345 by SDS-PAGE and analyzed by immunoblotting. At 18 hpi, the relative pNFkB/total-NFkB  
346 ratio significantly increased in response to poly(IC) stimulation with both low and high  
347 concentrations (~7-fold relative to untreated 18 h mock) (**Fig. 10C**). Similarly, poly(IC)  
348 treatment of NL09 or NL11 infected cells had a robust increase in NFkB activation (NL09  
349 = ~10-fold, NL11 = ~17-fold relative to untreated 18 h mock) (**Fig. 10C**). By 48 hpi, the  
350 observed NFkB activation was back to untreated-levels in mock, NL09 and NL11 infected  
351 cells. These data further support our results that IAV-induced NFkB activation is limited  
352 later during infection; likely suppressed by the viral NS1 (**Fig. 10C**).

353

## 354 **DISCUSSION**

355 Despite their clear susceptibility to rapidly arising resistance mutations, virus-targeted  
356 antivirals are still the only available class of antivirals against respiratory viruses such as  
357 influenza. In this study, we screened FDA approved SMKIs currently in clinical use  
358 against cancers and autoimmune diseases for their antiviral potential against IAV  
359 infections. Six of the eight NRTKIs we tested showed a potent inhibition of pandemic  
360 A(H1N1)pdm09 and seasonal A(H3N2) IAV strains with little to no impact on cell viability  
361 *in vitro*. We further validated these NRTKI candidates using a faithful *ex vivo* model of  
362 human PCLS. We identified the step(s) of the viral replication cycle affected by each  
363 compound. In doing so, we provide valuable information on the interplay of signaling  
364 pathways regulating these steps and the likely kinases involved.

365 Kinase dysfunction often leads to malignancies and tumor immune evasion.  
366 Therefore, kinases have been heavily targeted for cancer treatments using selective



367 inhibitors<sup>26</sup>. At the molecular level, most kinases regulate signaling pathways via catalytic  
368 and/or protein-scaffolding activities. Phosphorylation often triggers changes in protein  
369 conformation, enzymatic activity or subcellular localization; all of which allow fine-tuning  
370 of protein-protein interactions to mediate stimuli-specific responses<sup>53</sup>. Indeed, host  
371 kinases play a critical role in IAV entry, replication, and release as well as viral  
372 evasion/suppression of hosts immune responses. These processes often require  
373 phosphorylation of viral proteins by mostly unidentified kinases<sup>54-65</sup>.

374 We carried out our initial screening using A549 cells (ATII lung adenocarcinoma);  
375 however, due to potential biases associated with aberrant expression and kinase activity  
376 of cancerous cell-lines, we validated candidate NRTKIs using human PCLS (hPCLS).  
377 Unlike 2D monolayers or 3D well-differentiated air-liquid interface (ALI) cultures, PCLS  
378 preserve the native lung tissue architecture, cellular composition including endothelial,  
379 ATI and ATII epithelial cells, fibroblasts and maintain the native extracellular matrix<sup>33-35</sup>.  
380 Moreover, the tissue tropism and infectivity of certain viruses may not be accurately  
381 represented *in vitro* due to the absence of relevant cell-cell interactions that can influence  
382 infectibility and host responses<sup>66</sup>. Accordingly, we observed a similar discrepancy in  
383 which the strain-dependent differences observed in NRTKI-treated A549 cells were not  
384 observed in hPCLS, suggesting that the variations between IAV strains in A549 might be  
385 an *in vitro* artifact. Moreover, we observed a wide tissue tropism in hPCLS which suggests  
386 that while ATII cells may support more efficient infection, other cell-types of the lung are  
387 readily infectible as well. Nevertheless, we observed robust viral titer reductions in both  
388 systems following NRTKI treatment that were not readily explained by a reduction in  
389 infectivity or cell viability. Considering that the smallest reductions in viral titers were

390 observed following Defactinib (DF) < Acalabrutinib (AC) < Saracatinib (SA) < Bosutinib  
391 (BO) treatment, hPCLS infectivity was reduced by ~50% by each of those NRTKIs.  
392 Similarly, Ibrutinib (IB) and Nilotinib (NI) had the largest effect on viral titers but increased  
393 infectivity (NI:~22%, IB=~7%). Together our data suggest that reduction in infectivity of  
394 either A549 cells or hPCLS does not fully account for the potent reduction in viral titers  
395 and supports a *bona fide* effect of NRTKIs on either viral entry or RNA replication.

396 Although there is a growing body of *in vitro* and *in vivo* evidence to support the use of  
397 kinase inhibitors, not a single SMKI has been approved or licensed for the treatment of  
398 influenza virus infection so far <sup>4,13,14,17,60</sup>. SMKI selectivity remains a contentious topic and  
399 has been a hurdle to the pursuit of kinase inhibitors as antivirals. Assumptions made  
400 regarding “off-target effects” are attributed to changes in phosphorylation or activation of  
401 proteins/pathways besides the intended target. While compounds still in the pre-clinical  
402 development phase require target validation, the selectivity of compounds in clinical use  
403 has been heavily investigated <sup>26,67-69</sup>. The ever-expanding kinase-substrate interaction  
404 map highlights the extensive crosstalk between signaling pathways. Therefore, inhibition  
405 of an “off-target” kinase or pathway, cannot be oversimplified and attributed to promiscuity  
406 of the SMKI in question; rather it is more likely evidence of an interaction between the  
407 intended target and the affected “off-target” signaling node. Two seminal studies  
408 collectively examined selectivity of over 170 SMKIs against more than 440 kinases,  
409 covering ~80% of the human kinome. In the first study, Davis et al. compared inhibitor-  
410 kinase binding affinities, whereas Anastassiadis et al. used functional kinase inhibition  
411 assays in the second study. They determined that while classes of SMKIs may inhibit  
412 multiple kinases within a single subfamily, inhibitors are selective against kinases outside

413 that subfamily <sup>68,69</sup>. However, a limitation of those studies is that they were carried out  
414 using truncated or fused recombinant proteins that may adopt altered conformations in  
415 the absence of regulatory domains (i.e., regulatory subunit of PI3K) or binding partners  
416 that may influence availability of substrate or ATP binding sites <sup>26</sup>. Moreover, selectivity  
417 of clinically approved SMKIs was validated by super resolution microscopy (dSTORM) to  
418 show the superior specificity and selectivity of fluorescently labeled SMKIs like Gefitinib  
419 (EGFR inhibitor), over either a fluorescently labeled EGF ligand or an EGFR monoclonal  
420 antibody <sup>70</sup>.

421 In addition to their therapeutic uses, kinase inhibitors are used as molecular beacons  
422 to probe host signaling pathways and delineate how they are regulated by kinases. It is  
423 not surprising that NRTKIs which target known effectors of IAV entry have a significant  
424 effect on this step of the replication cycle. Indeed, we previously showed that targeting  
425 FAK using the pre-clinical inhibitor Y15, led to inhibition of PI3K-mediated endosomal  
426 trafficking of virions <sup>28</sup>. Using the FDA-approved FAK inhibitor DF, we saw comparable  
427 effects on actin reorganization and viral entry as we previously observed using Y15 <sup>28</sup>.  
428 This is consistent with the fact that the most prominent effect of DF on viral replication in  
429 both A549 and hPCLS was at earlier time-points when reduction in viral entry may have  
430 a larger impact than at later time-points. Indeed, we observed a reduction in infectivity in  
431 response to DF treatment which is consistent with the observed reduction of viral entry.

432 Bruton's tyrosine kinase (BTK) activity regulates survival, proliferation and  
433 inflammatory responses in B-cells, as well as epithelial cells <sup>71</sup>. Cell-specific BTK isoforms  
434 have recently been implicated in PI3K and PLC $\gamma$  signaling that are either pro- or anti-  
435 apoptotic <sup>72</sup>. IB and AC are two high-affinity irreversible inhibitors of BTK; IB also inhibits

436 EGFR activity<sup>73,74</sup>. IB treatment reduces excessive neutrophil infiltration, acute lung injury  
437 (ALI) and subsequent ARDS; ultimately resulting in increased survival of mice severely  
438 infected with IAV<sup>27</sup>. Given that IB inhibits both EGFR and BTK whereas AC selectively  
439 inhibits BTK, the IB-specific reduction in viral entry we observed, suggests this effect is  
440 mediated largely through inhibition of EGFR signaling. This is consistent with IAV-induced  
441 EGFR signaling which facilitates viral entry and activation of downstream pathways (Src,  
442 PI3K and ERK) that promote efficient replication<sup>75</sup>.

443 BO, along with NI and SA, are second-generation Src inhibitors. BO also inhibits Abl  
444 kinase and to a lesser extent BTK. Src orchestrates signaling across multiple pathways  
445 that regulate proliferation, survival, cell-cell communication, innate immune responses  
446 and apoptosis<sup>25</sup>. Growth factor RTKs like PDGFR and EGFR induce Src-mediated  
447 activation of PI3K/AKT, Ras-Raf-MEK-ERK, FAK, and STAT3<sup>76</sup>. Accordingly, Src plays  
448 a mostly proviral role during IAV infections that is modulated by the viral NS1 protein<sup>13,77</sup>.  
449 In contrast, Abl's role in human IAV infections is not clear; however, Abl inhibition by some  
450 avian IAVs results in significant pathology *in vitro* and *in vivo*<sup>78,79</sup>. We observed a  
451 significant reduction in viral titers following BO treatment of hPCLS and A549 cells which  
452 also resulted in a stark reduction in viral entry, largely due to disruption of the actin  
453 network. Despite the increase in cell viability during infection, we observed a complete  
454 absence of detectible actin filaments suggesting either enhanced depolymerization of F-  
455 actin or altered actin dynamics. Consequently, BO inhibition of Src activity can lead to  
456 actin depolymerization due to retention of alpha and  $\beta$ -catenin at the cell membrane<sup>80,81</sup>.

457 To dissect the effect of our NRTKIs on polymerase activity, we employed a  
458 polymerase activity reporter system<sup>82</sup>. Interestingly, in the context of viral infections, we

459 detected higher polymerase reporter activity in NL11 (H3N2)-infected cells. In contrast,  
460 significantly higher polymerase activity was detected using NL09 (H1N1) minigenome.  
461 Faster kinetics may be more susceptible to NRTKIs as a reduction in replication rate  
462 results in exponential differences with time. This suggest that polymerase activity of NL09  
463 is higher than NL11 and that the faster kinetics in virus replication observed in NL11  
464 infected cells may be due to more efficient virus entry, release, or immune evasion than  
465 NL09.

466 In addition to its role in viral entry, we previously demonstrated that FAK regulates the  
467 polymerase activity *in vitro* of multiple IAV strains using Y15 as well as dominant-negative  
468 kinase mutants <sup>29</sup>. However, in contrast to our previous studies, we only observed a  
469 modest and non-significant effect on polymerase activity following DF treatment. O'Brien  
470 et al. showed that Y15 was a significantly more potent and selective inhibitor of FAK  
471 activity than DF which also targets the FAK related kinase Pyk2 <sup>83</sup>. The disparity between  
472 a given SMKI's binding affinity ( $K_d$ ) and its functional inhibitory concentrations can also  
473 be observed in the case of a single inhibitor targeting multiple kinases. For instance, the  
474  $K_d$  of the multi-kinase inhibitor Sunitinib for TrkC is 5.1  $\mu\text{M}$ , but a 10-fold lower  
475 concentration (0.5  $\mu\text{M}$ ) is sufficient to inhibit >97% of its activity. In contrast, Sunitinib's  
476  $K_d$  for PAK3 is 16 nM, but not even a 30-fold higher concentration (0.48  $\mu\text{M}$ ) has an effect  
477 on its activity <sup>67</sup>. Therefore, the difference in potency of FAK inhibition by DF vs Y15 may  
478 account for the limited effect of DF treatment on IAV polymerase activity we observed.

479 Inhibition of Src by SA, BTK and EGFR by IB, and BTK by AC had less of a significant  
480 effect on IAV polymerase activity indicating that the contribution of these kinases to host  
481 innate immune responses does not directly affect RNA replication. In contrast, inhibition

482 of Abl and PDGFR $\alpha$  by NI treatment had the most significant reduction in IAV polymerase  
483 activity that was also strain independent. These data point to a role of PDGFR $\alpha$  in  
484 facilitating efficient IAV polymerase activity. This is consistent with previous findings that  
485 show inhibition of PDGFR $\alpha$  by the RTK inhibitor A9, blocks RNA synthesis of all viral RNA  
486 species (vRNA, cRNA and mRNA) independently of NF $\kappa$ B signaling<sup>56</sup>.

487 The NF $\kappa$ B pathway typically mediates inflammatory/antiviral responses to viral  
488 infections and accordingly, it plays a critical role in IAV replication and pathogenesis.  
489 Several reports indicate that IAVs modulate antiviral NF $\kappa$ B activity to facilitate viral  
490 replication. Inhibition of NF $\kappa$ B results in reduced viral titers partly due to a disruption of  
491 vRNP nuclear export<sup>84-86</sup>. Consistent with previous data, we did not observe a robust  
492 induction in NF $\kappa$ B phosphorylation, most likely due to the immuno-suppressive role of the  
493 viral NS1 protein<sup>87</sup>. However, we observed a clear induction of NF $\kappa$ B activation by  
494 poly(IC) treatment alone or in combination with IAV infection at 18 h but not 48 h.

495 In addition to its role in actin reorganization, FAK modulates the cellular immune  
496 response by regulating various T-cell-, B-cell-, and macrophage-functions as well as RIG-  
497 I-Like antiviral signaling<sup>88-91</sup>. We previously demonstrated FAK-dependent regulation of  
498 NF $\kappa$ B signaling and polymerase activity *in vitro* and NF $\kappa$ B-dependent pro-inflammatory  
499 responses *in vivo*<sup>30</sup>. In that study, FAK inhibition resulted in increased survival, reduced  
500 viral load and reduction in a severe infection model. Surprisingly, DF treatment had no  
501 significant effect on NF $\kappa$ B phosphorylation; this again, is likely due to the difference in  
502 FAK inhibition potency between Y15 and DF. Similarly, none of the other NRTKs  
503 influenced NF $\kappa$ B activation suggesting that the mechanism by which these NRTKs inhibit  
504 virus replication is independent of the NF $\kappa$ B-pathway. Considering the transient and

505 biphasic nature of NFkB activation, we cannot rule out that strain-dependent differences  
506 in kinetics did not affect the magnitude or duration of NFkB activation we observed<sup>92,93</sup>.

507 An emerging regulator of IFN and inflammatory responses is STAT3. A wide range of  
508 cytokine, growth factor, and RTKs activate STAT3 via JAK1/2/3 and Tyk2-dependent  
509 phosphorylation at Y705 (STAT3pY705)<sup>94</sup>. The role of STAT3 is not fully understood with  
510 opposing functions dependent on pathway partner; IL-6 mediated STAT3 activation is  
511 proinflammatory while IL-10 mediated STAT3 activation is anti-inflammatory<sup>94,95</sup>.  
512 Although STAT3 is dispensable for IFN signaling, it is activated by IFN-I and serves as a  
513 negative regulator to fine-tune the IFN response (reviewed in<sup>95</sup>). Because STAT3  
514 activation upregulates anti-apoptotic factors, H5N1 mediated STAT3pY705 allows  
515 prolonged viral production through delay of apoptosis; H1N1 is less efficient at  
516 STAT3pY705 and triggers apoptosis earlier<sup>96,97</sup>. Although the mechanism of differential  
517 suppression of STAT3 activation by IAV is not clear, it has been suggested to be mediated  
518 by NS1<sup>87</sup>. Interestingly, EGFR activation can result in Src/FAK/BTK mediated activation  
519 of STAT3, thereby modulating the IFN and proinflammatory responses. As expected of  
520 H1N1 and H3N2 infections<sup>96,97</sup>, we observed a suppression of STAT3pY705 in untreated  
521 cells that was comparable to that observed following treatment with most NRTKIs.  
522 Surprisingly, we observed significant suppression of STATpY705 following DF treatment  
523 (85-90% of untreated infected cells). Considering that DF inhibits both FAK and Pyk2, it  
524 is tempting to speculate that STAT3pY705 requires FAK/Pyk2 activity during IAV  
525 infection. Indeed, Pyk2 kinase activity was required to induce EGFR/Src-mediated  
526 STAT3pY705<sup>98</sup>. Interestingly, STAT3pS727 which is required for full transcriptional

527 activity of STAT3, points to an indirect Pyk2 mechanism possibly through JNK, p38 or  
528 ERK activation <sup>98</sup>.

529 In summary, we have demonstrated that NRTKs are host cell factors required for  
530 efficient IAV replication and represent promising drug targets for the development of the  
531 next generation of antivirals. Because these inhibitors target host factors, their therapeutic  
532 window is likely to be different than that of virus-targeted antivirals. To our surprise, our  
533 tested NRTKIs directly affected steps of the virus replication cycle with limited effects on  
534 tested host responses. Importantly, our results were validated using an *ex vivo* lung tissue  
535 model from several donors. Given that most of our PCLS were obtained from lung cancer  
536 tumor resections, our donors tend to be older, are often smokers and suffer from either  
537 COPD or other respiratory pathologies. Although at first glance this may seem like a  
538 limitation of our model, we believe that these donors represent the “at risk” populations  
539 that would most benefit from IAV antivirals. Therefore, our data obtained from donor  
540 PCLS using these already FDA-approved NRTKIs as IAV antivirals is highly applicable to  
541 clinical settings. In contrast to virus-directed IAV antivirals which are susceptible to  
542 resistance mutations, our data indicate a high genetic barrier for resistance to our tested  
543 NRTKIs. This is based on the stability of IAV inhibition after 5 passages under selective  
544 pressure by each of our six validated inhibitors. Although we cannot rule out NRTKIs-  
545 selected mutations, no resistance/adaptive variants were detected. Additionally, their  
546 established safety and bioavailability data further warrants the evaluation of these  
547 compounds as potential influenza treatments. Given that IAV infections are typically  
548 restricted to the respiratory tract, localized delivery of the kinase inhibitors can further limit  
549 potential cytotoxic effects. Finally, the local microenvironment must be considered to elicit



550 a balanced immune response. Likewise, the effect of promising kinase inhibitors on  
551 resident and infiltrating immune cells must be investigated to avoid opposite or  
552 unintended consequences. Considering that many viruses, including respiratory viruses,  
553 utilize the same (or related) host kinases to facilitate their replication and transmission,  
554 our studies have broader implications for the potential use of these SMKIs to treat  
555 infections by other viruses in addition to IAV infections.

556 **MATERIALS AND METHODS**

557 ***Cells and Viruses.*** Madin-Darby canine kidney (MDCK) cells were cultured in Dulbecco's  
558 modified Eagle medium (DMEM; Gibco) supplemented with 10% fetal bovine serum  
559 (FBS), 100 IU/mL penicillin, 100 µg/mL streptomycin, 2 mM glutamine, and 1%  
560 nonessential amino acids (NEAAs). A549 cells were cultured in F-12 K-Nut Nutrient Mix  
561 medium (Gibco) supplemented with 10% FBS, 100 IU/ml penicillin, 100 µg/ml  
562 streptomycin, and 2 mM Glutamax. All cells were incubated at 37°C and 5% CO<sub>2</sub>.

563 The pandemic H1N1 strain A/Netherlands/602/09 (NL09) and seasonal strain H3N2  
564 A/Netherlands/241/11 (NL11) influenza viruses were obtained from the Repository of the  
565 National Influenza Center at the Erasmus Medical Center in Rotterdam, the Netherlands,  
566 and were grown on MDCKs for 48h at 37 °C. Virus stocks and culture supernatants were  
567 stored at -80°C until further use. Virus yields were titrated on MDCK cells by 50% tissue  
568 culture infectious dose (TCID<sub>50</sub>)/ml method as described by Reed and Muensch<sup>99</sup>.

569  
570 ***Human precision-cut lung slices (PCLS).*** Human PCLS for *ex vivo* studies were  
571 generated from lung tissues obtained from patients undergoing surgical operations at  
572 Hannover Medical School. Tissues used for PCLS generation that were obtained from  
573 lung tumor resections were confirmed as tumor-free by an experienced pathologist. The  
574 freshly obtained lung tissues were processed into circular slices that were 300 microns  
575 thick and 8 mm in diameter as previously described<sup>34</sup>. All donors provided informed  
576 consent as approved by the Hannover Medical School Ethics Committee (Ethics vote  
577 #8867\_BO\_K\_2020). PCLS were maintained in DMEM/F12 medium (ThermoFisher)

578 supplemented with 2 mM of HEPES, 1 × GlutaMAX (Gibco), 100 U/ml penicillin and 100  
579 µg/ml streptomycin in a humidified 37°C and 5% CO<sub>2</sub> incubator.

580

581 ***Inhibitors.*** Small molecule kinase inhibitors (SMKI) were all purchased from Selleckchem  
582 (TX, USA). Inhibitors were diluted in DMSO to a stock concentration of 10mM and stored  
583 at -20°C upon usage.

584

585 ***In vitro and ex vivo cytotoxicity assays.*** *In vitro* cytotoxicity of SMKIs on mock and/or  
586 virus infected A549 cells was determined using CellTiter-Glo 2.0 (CTG) Cell Viability  
587 Assay (Promega) according to manufacturer protocols.

588 Cytotoxicity of SMKIs on mock and/or virus-infected PCLS was determined using the  
589 LDH-Glo Cytotoxicity Assay (Promega) according to manufacturer's protocols.  
590 Supernatants of SMKI-treated and untreated hPCLS were collected and completely  
591 replaced with fresh pre-warmed infection medium containing SMKIs at the indicated  
592 concentrations. LDH levels were relative to the positive control (treated with 1% triton-X  
593 100 for 30 min at 37°C).

594

595 ***Virus infections.*** A549 cells were plated on the day prior to infection so they were 80-  
596 90% confluent on the day of infection. For infections, viruses were diluted in infection  
597 medium (F12K containing 0.1% [vol/vol] bovine serum albumin [BSA] and 50 ng/µl TPCK-  
598 treated trypsin). The cells were inoculated with the virus at the indicated multiplicity of  
599 infection (MOI) for 1h at 37°C. The cells were washed twice with phosphate-buffered  
600 saline containing Mg<sup>2+</sup>/Ca<sup>2+</sup> (PBS+/+) to remove unbound virus and incubated in infection

601 medium at 37°C in the presence or absence of SMKIs at the indicated concentrations.  
602 Supernatants were collected at 0, 24, 48, 72 hours post-infection (hpi), and viral titers  
603 were determined by TCID<sub>50</sub> assay in MDCK cells<sup>99</sup>. GraphPad's Heatmap (Prism)  
604 function was used to visualize the fold-reduction in viral titers.

605

606 ***Immunofluorescent staining and imaging.*** To visualize virus infection, infected cells  
607 were fixed with 4% paraformaldehyde (4% PFA) for 30 minutes at room temperature (RT),  
608 permeabilized with 0.1% Triton X-100 for 15 minutes at RT, washed with PBS and blocked  
609 with heat inactivated 5% horse serum in PBS (PBS-HS) at RT for 1h. Cells were then  
610 incubated with mouse monoclonal antibodies to IAV nucleoprotein (clone HB65, ATCC)  
611 diluted in PBS-HS at 0.2 µg/ml overnight at 4°C under constant agitation. Cells were  
612 washed and incubated with AlexaFluor-594 conjugated goat anti-mouse IgG antibody (0.2  
613 µg/ml; ThermoFisher) and NucBlue Live ReadyProbes Reagent (ThermoFisher) for 1h at  
614 RT under constant agitation. Cells were washed 3 times with PBS, images were captured  
615 using a Leica DMI8 fluorescence microscope and quantitative analysis was performed  
616 using ImageJ Threshold, Watershed, and Particle Analyser tools.

617 Using a counting macro that we adapted from<sup>100</sup>, we quantified the number of nuclei  
618 and the number of separate infected cells by analyzing the RAW image data for each  
619 channel (n=4). The nucleus count was used to define the total cell number per 0.6 mm<sup>2</sup>.  
620 The NP staining was used to define the number of infected cells per 0.6 mm<sup>2</sup>. The ratio  
621 of infected to total cells was used to calculate Relative Infectivity. The total number of  
622 cells based on nuclei detected relative to mock-infected cells treated with the respective

623 NRTKI was used to determine Relative Viability. GraphPad's Heatmap (Prism) function  
624 was used for visualization.

625

626 ***Immuno-histochemistry staining.*** Mock- and virus-Infected PCLS were inactivated by  
627 fixation in 4% PFA/PBS and paraffin-embedded into blocks. Tissue sections (2  $\mu$ m thick)  
628 were cut from the paraffin-embedded blocks and subjected to Hematoxylin & Eosin (HE)  
629 staining using standard protocols. Immunostaining for IAV antigen was done using a  
630 HRP-conjugated anti-IAV NP antibody. Histological analysis was performed by an  
631 experienced pathologist blinded to clinical data and experimental setup using a routine  
632 diagnostic light microscope (BX43, Olympus). Representative images were acquired with  
633 an Olympus CS50 camera using Olympus CellSens software (Olympus). Semi-  
634 quantitative analysis of IAV NP signal was performed for all tested NRTKIs using FIJI  
635 image-analysis software.

636

637 ***Polymerase activity assay.*** Semi-confluent (~70–80%) A549 cells ( $8 \times 10^4$  cells in 24-  
638 well plates) were transfected using Lipofectamine LTX with The pPOLI-358-FFLuc  
639 reporter plasmid, which encodes a firefly luciferase gene under control of the viral  
640 nucleoprotein (NP) promoter (kindly provided by Megan Shaw)<sup>50-52</sup>; the Lonza  
641 pmaxGFP™ expression vector, was used as a transfection control.

642 For minigenome polymerase activity, a mix of plasmids encoding the PB2, PB1, PA, and  
643 NP genes of NL09 or A/NL/213/03 (H3N2) IAVs in quantities of 0.35, 0.35, 0.35, and 0.5  
644  $\mu$ g, respectively, were co-transfected with the reporter and control plasmids. At 6h post-  
645 transfection (hpt), the indicated SMKIs were added at 1x and 0.5x concentrations (see

646 Table 1) and at 30 hpt (24h of treatment), luciferase reporter activity was detected using  
647 the One-Glo luciferase assay system (Promega). GFP mean fluorescence intensity (MFI)  
648 and luciferase luminescence were measured using a Tecan multi-mode plate reader.

649 To measure polymerase activity during IAV infection, cells were infected at an MOI of  
650 1 with NL09 or NL11 at 24h post-transfection (hpt) of the pPOLI-358-FFLuc reporter and  
651 the GFP plasmids in the presence or absence of SMKIs at the indicated concentrations  
652 as described above. At 48 hpt (24 hpi), luciferase reporter activity was detected using the  
653 One-Glo luciferase assay system (Promega). GFP mean fluorescence intensity (MFI) and  
654 luciferase luminescence were measured using a Tecan multi-mode plate reader.

655

656 ***Viral entry assay and confocal microscopy.*** A549 cells were seeded on 12.5-mm  
657 coverslips in 24-well plates. On the day of infection, cells were washed 3 times with  
658 PBS+/+ and incubated in infection medium in the presence or absence of kinase inhibitors  
659 for 2h. The cells were chilled on ice for 15 min and inoculated with virus (MOI=10) in the  
660 presence or absence of the indicated SMKI concentrations at 4°C and on ice for 30 min.  
661 To limit receptor activation due to continuous viral-receptor engagement/internalization  
662 following the 4°C adsorption and to gently warm up the cells, unbound/noninternalized  
663 virus was removed by washing the cells twice with RT PBS+/+. The cells were then  
664 incubated with prewarmed infection medium containing the respective SMKIs at 37°C for  
665 30 min. Cells were then fixed in 4% PFA for 30 min, permeabilized with 0.1% Triton X-  
666 100 at RT for 15 min, washed in PBS, and incubated overnight at 4°C in blocking buffer  
667 (PBS-HS). The cells were then incubated with anti-IAV NP antibody (clone HB65, ATCC)  
668 diluted in blocking buffer for 1h at RT, washed 3 times with PBS, and incubated for 1h at

669 RT with AlexaFluor488-conjugated donkey anti-mouse IgG secondary antibody (0.2  
670  $\mu\text{g/ml}$ ; ThermoFisher) diluted PBS-HS. Cell nuclei and F-Actin were stained with NucBlue  
671 Live ReadyProbes (ThermoFisher) and ActinRed-555 ReadyProbes Reagent  
672 (ThermoFisher), respectively. Coverslips were mounted with Prolong mounting medium  
673 (Invitrogen), and cell images were acquired with a Leica TSC SP5 laser-scanning  
674 confocal system mounted on an upright Leica DM6000 CFS using a 63x oil immersion  
675 objective. The images were merged and analyzed with Leica LAS software using identical  
676 imaging settings across all experiments.

677

678 ***NRTKI resistance analysis.*** To assess the resistance barrier for our NRTKIs, we  
679 passaged our viruses five times in the presence or absence of submaximal inhibitor  
680 concentrations (0.5x; see table 1). The parental viruses were also passaged under the  
681 same culture conditions in parallel in the absence of NRTKIs. Semi-confluent MDCK cells  
682 ( $\sim 10^6$  cells/well in 6-well plates) were infected with the pandemic H1N1 strain  
683 A/Netherlands/602/09 (NL09) and seasonal strain H3N2 A/Netherlands/241/11 (NL11) at  
684 MOI 0.001. At each passage, the cultures were maintained in 3 ml MDCK infection media  
685 at 37°C for 72h, in the presence or absence of the  $[0.5x]_{\text{max}}$  (see Tab. 1) of respective  
686 candidate NRTKIs. Supernatants were harvested, clarified by centrifugation at 500 x g for  
687 5 min at 4°C, and stored at -80°C until titration by TCID<sub>50</sub> assay on MDCK cells. For the  
688 subsequent passage, cells were infected by using virus from the previous passage at  
689 MOI=0.001.

690

691 **SDS-PAGE and immunoblotting.** Proteins were isolated from whole cell lysates using  
692 the M-PER Mammalian Protein Extraction Reagent (ThermoScientific). Proteins were  
693 quantified by Bradford Assay, separated by 8% SDS-PAGE, transferred onto a PVDF  
694 membrane and blocked overnight in blocking solution (TBS pH7.6, 0.05% Tween-20, and  
695 5% w/v of nonfat dry milk). Primary antibodies were diluted in blocking solution overnight  
696 at 4°C: phos-NFkB p65 (Ser536) (93H1) Rabbit mAb (1:1000) (Cell Signaling), phos-Stat3  
697 (Tyr705) (D3A7) rabbit mAb (1:1000) (Cell Signaling), Influenza A virus NP Antibody  
698 (PA5-32242) rabbit pAb (1:20,000) (ThermoScientific). Beta-Actin (BA3R) mAb (1:5000)  
699 was used as a loading control. HRP-conjugated secondary anti-rabbit or anti-mouse  
700 antibodies (1:20,000) were diluted in blocking solution for 1 hour at room temperature.  
701 Proteins were detected by chemiluminescence using the SuperSignal West Pico Plus and  
702 SuperSignal™ West Femto Maximum Sensitivity Substrate. Band density was measured  
703 using a Li-Cor C-DiGit scanner and analyzed using Image Studio™ (Li-Cor). When  
704 necessary, the imaged membrane was subsequently stripped using a mild water-based  
705 stripping solution (1.5% glycine; 0.1% SDS; 1% Tween-20; pH 2.2) and restained for total  
706 proteins using NFkB p65 (L8F6) mouse mAb (1:1000) (Cell Signaling) or Stat3 (124H6)  
707 mouse mAb (1:1000) (Cell Signaling).

708

709 **Statistical analyses.** Statistical analyses with GraphPad Prism 9 included multiple *t* test,  
710 Brown-Forsythe and Welch's ANOVA tests and Dunnett's T3 test for multiple  
711 comparisons. Values are represented as means standard deviations (SD) or standard  
712 error of the mean (SEM), with a *P* value of 0.05 considered statistically significant (ns =



713  $P > 0.05$ ; \* =  $P \leq 0.05$ ; \*\* =  $P \leq 0.01$ ; \*\*\* =  $P \leq 0.001$ ; \*\*\*\* =  $P \leq 0.0001$ ). The performed  
714 tests and given significances are provided in the figure legends.

715

716

717

718

719 **ACKNOWLEDGMENTS**

720 This work was supported by the Alexander von Humboldt Foundation in the framework  
721 of the Alexander von Humboldt Professorship endowed by the German Federal Ministry  
722 of Education and Research; and by the European Union's Horizon 2020 Research and  
723 Innovation Program grant number 848166 [ISOLDA]. DJ is supported by a European  
724 Consolidator grant, XHale (ref. no. 771883). The author's would like to thank Regina  
725 Engelhardt, Nicole Kröncke, Annette Müller-Brechlin and Christina Petzold-Mügge for  
726 their extraordinary technical support.

727

728 **AUTHOR CONTRIBUTIONS**

729 HE conceived the project. HE, RM and GR designed the experiments and supervised the  
730 project. RM, SS, MB performed the experiments. HE, RM, conducted data analysis. CW,  
731 MK and DJ generated and provided human PCLS. CW and MK provided histopathological  
732 and immunohistochemical evaluation of PCLS. RM, GR and HE wrote the manuscript  
733 with input from all the authors.

734

735 **CONFLICT OF INTEREST**

736 The authors declare no conflict of interest.

## REFERENCES

- 737  
738
- 739 1 Elbahesh, H., Saletti, G., Gerlach, T. & Rimmelzwaan, G. F. Broadly protective  
740 influenza vaccines: design and production platforms. *Curr Opin Virol* **34**, 1-9,  
741 doi:10.1016/j.coviro.2018.11.005 (2019).
- 742 2 Jansen, J. M., Gerlach, T., Elbahesh, H., Rimmelzwaan, G. F. & Saletti, G. Influenza  
743 virus-specific CD4+ and CD8+ T cell-mediated immunity induced by infection and  
744 vaccination. *J Clin Virol* **119**, 44-52, doi:10.1016/j.jcv.2019.08.009 (2019).
- 745 3 Wong, S.-S. & Webby, R. J. Traditional and new influenza vaccines. *Clinical*  
746 *microbiology reviews* **26**, 476-492, doi:10.1128/CMR.00097-12 (2013).
- 747 4 Webster, R. G. & Govorkova, E. A. Continuing challenges in influenza. *Annals of the*  
748 *New York Academy of Sciences* **1323**, 115-139, doi:10.1111/nyas.12462 (2014).
- 749 5 Nelson, M. I., Simonsen, L., Viboud, C., Miller, M. A. & Holmes, E. C. The origin and  
750 global emergence of adamantane resistant A/H3N2 influenza viruses. *Virology* **388**,  
751 270-278, doi:10.1016/j.virol.2009.03.026 (2009).
- 752 6 Lackenby, A. *et al.* Global update on the susceptibility of human influenza viruses to  
753 neuraminidase inhibitors and status of novel antivirals, 2016-2017. *Antiviral research*  
754 **157**, 38-46, doi:10.1016/j.antiviral.2018.07.001 (2018).
- 755 7 Baranovich, T. *et al.* The neuraminidase inhibitor oseltamivir is effective against  
756 A/Anhui/1/2013 (H7N9) influenza virus in a mouse model of acute respiratory  
757 distress syndrome. *The Journal of infectious diseases* **209**, 1343-1353,  
758 doi:10.1093/infdis/jit554 (2014).

- 759 8 Mifsud, E. J., Hayden, F. G. & Hurt, A. C. Antivirals targeting the polymerase  
760 complex of influenza viruses. *Antiviral research* **169**, 104545,  
761 doi:10.1016/j.antiviral.2019.104545 (2019).
- 762 9 Mullard, A. FDA approves first new flu drug in 20 years. *Nat Rev Drug Discov* **17**,  
763 853, doi:10.1038/nrd.2018.219 (2018).
- 764 10 Hayden, F. G. *et al.* Baloxavir Marboxil for Uncomplicated Influenza in Adults and  
765 Adolescents. *N Engl J Med* **379**, 913-923, doi:10.1056/NEJMoa1716197 (2018).
- 766 11 Omoto, S. *et al.* Characterization of influenza virus variants induced by treatment  
767 with the endonuclease inhibitor baloxavir marboxil. *Sci Rep* **8**, 9633,  
768 doi:10.1038/s41598-018-27890-4 (2018).
- 769 12 Uehara, T. *et al.* Treatment-Emergent Influenza Variant Viruses With Reduced  
770 Baloxavir Susceptibility: Impact on Clinical and Virologic Outcomes in  
771 Uncomplicated Influenza. *The Journal of infectious diseases* **221**, 346-355,  
772 doi:10.1093/infdis/jiz244 (2020).
- 773 13 Meineke, R., Rimmelzwaan, G. F. & Elbahesh, H. Influenza Virus Infections and  
774 Cellular Kinases. *Viruses* **11**, doi:10.3390/v11020171 (2019).
- 775 14 Kumar, N. *et al.* Host-Directed Antiviral Therapy. *Clin Microbiol Rev* **33**,  
776 doi:10.1128/CMR.00168-19 (2020).
- 777 15 Watanabe, T., Watanabe, S. & Kawaoka, Y. Cellular networks involved in the  
778 influenza virus life cycle. *Cell Host Microbe* **7**, 427-439,  
779 doi:10.1016/j.chom.2010.05.008 (2010).

- 780 16 Schwartz, D. M. *et al.* JAK inhibition as a therapeutic strategy for immune and  
781 inflammatory diseases. *Nature reviews. Drug discovery* **17**, 78-78,  
782 doi:10.1038/nrd.2017.267 (2017).
- 783 17 Ludwig, S., Zell, R., Schwemmler, M. & Herold, S. Influenza, a One Health paradigm-  
784 -novel therapeutic strategies to fight a zoonotic pathogen with pandemic potential.  
785 *Int J Med Microbiol* **304**, 894-901, doi:10.1016/j.ijmm.2014.08.016 (2014).
- 786 18 Kumar, N., Sharma, N. R., Ly, H., Parslow, T. G. & Liang, Y. Receptor tyrosine  
787 kinase inhibitors that block replication of influenza a and other viruses. *Antimicrobial*  
788 *agents and chemotherapy* **55**, 5553-5559, doi:10.1128/AAC.00725-11 (2011).
- 789 19 Johnson, L. N. & Lewis, R. J. Structural basis for control by phosphorylation. *Chem*  
790 *Rev* **101**, 2209-2242 (2001).
- 791 20 Manning, G., Whyte, D. B., Martinez, R., Hunter, T. & Sudarsanam, S. The protein  
792 kinase complement of the human genome. *Science (New York, N.Y.)* **298**, 1912-  
793 1934, doi:10.1126/science.1075762 (2002).
- 794 21 Turner, N. & Grose, R. Fibroblast growth factor signalling: from development to  
795 cancer. *Nat Rev Cancer* **10**, 116-129, doi:10.1038/nrc2780 (2010).
- 796 22 Frojdo, S., Vidal, H. & Pirola, L. Alterations of insulin signaling in type 2 diabetes: a  
797 review of the current evidence from humans. *Biochim Biophys Acta* **1792**, 83-92,  
798 doi:10.1016/j.bbadis.2008.10.019 (2009).
- 799 23 Flight, M. H. Neurodegenerative diseases: New kinase targets for Alzheimer's  
800 disease. *Nat Rev Drug Discov* **12**, 739, doi:10.1038/nrd4132 (2013).

- 801 24 Siveen, K. S. *et al.* Role of Non Receptor Tyrosine Kinases in Hematological  
802 Malignances and its Targeting by Natural Products. *Mol Cancer* **17**, 31,  
803 doi:10.1186/s12943-018-0788-y (2018).
- 804 25 Azevedo, A., Silva, S. & Rueff, J. Non-receptor Tyrosine Kinases Role and  
805 Significance in Hematological Malignancies. *Tyrosine Kinases as Druggable Targets*  
806 *in Cancer*, doi:10.5772/intechopen.84873 (2019).
- 807 26 Roskoski, R., Jr. Properties of FDA-approved small molecule protein kinase  
808 inhibitors: A 2021 update. *Pharmacol Res* **165**, 105463,  
809 doi:10.1016/j.phrs.2021.105463 (2021).
- 810 27 Florence, J. M. *et al.* Inhibiting Bruton's tyrosine kinase rescues mice from lethal  
811 influenza-induced acute lung injury. *American journal of physiology. Lung cellular*  
812 *and molecular physiology* **315**, L52-L58, doi:10.1152/ajplung.00047.2018 (2018).
- 813 28 Elbahesh, H. *et al.* Novel roles of focal adhesion kinase in cytoplasmic entry and  
814 replication of influenza A viruses. *Journal of virology* **88**, 6714-6728,  
815 doi:10.1128/JVI.00530-14 (2014).
- 816 29 Elbahesh, H., Bergmann, S. & Russell, C. J. Focal adhesion kinase (FAK) regulates  
817 polymerase activity of multiple influenza A virus subtypes. *Virology* **499**, 369-374,  
818 doi:10.1016/j.virol.2016.10.002 (2016).
- 819 30 Bergmann, S. & Elbahesh, H. Targeting the proviral host kinase, FAK, limits  
820 influenza a virus pathogenesis and NFkB-regulated pro-inflammatory responses.  
821 *Virology* **534**, 54-63, doi:10.1016/j.virol.2019.05.020 (2019).

- 822 31 Ghoreschi, K. *et al.* Modulation of Innate and Adaptive Immune Responses by  
823 Tofacitinib (CP-690,550). *The Journal of Immunology* **186**, 4234-4243,  
824 doi:10.4049/jimmunol.1003668 (2011).
- 825 32 Boor, P. P. C. *et al.* JAK-inhibitor tofacitinib suppresses interferon alfa production by  
826 plasmacytoid dendritic cells and inhibits arthrogenic and antiviral effects of interferon  
827 alfa. *Translational Research* **188**, 67-79,  
828 doi:<https://doi.org/10.1016/j.trsl.2016.11.006> (2017).
- 829 33 Liu, G. *et al.* Use of precision cut lung slices as a translational model for the study of  
830 lung biology. *Respir Res* **20**, 162, doi:10.1186/s12931-019-1131-x (2019).
- 831 34 Preuss, E. B. *et al.* The Challenge of Long-Term Cultivation of Human Precision-Cut  
832 Lung Slices. *Am J Pathol*, doi:10.1016/j.ajpath.2021.10.020 (2021).
- 833 35 Viana, F., O'Kane, C. M. & Schroeder, G. N. Precision-cut lung slices: A powerful ex  
834 vivo model to investigate respiratory infectious diseases. *Mol Microbiol*,  
835 doi:10.1111/mmi.14817 (2021).
- 836 36 Changelian, P. S. *et al.* Prevention of organ allograft rejection by a specific Janus  
837 kinase 3 inhibitor. *Science (New York, N.Y.)* **302**, 875-878,  
838 doi:10.1126/science.1087061 (2003).
- 839 37 Quintás-Cardama, A. *et al.* Preclinical characterization of the selective JAK1/2  
840 inhibitor INCB018424: therapeutic implications for the treatment of myeloproliferative  
841 neoplasms. *Blood* **115**, 3109-3117, doi:10.1182/blood-2009-04-214957 (2010).
- 842 38 Manley, P. W. *et al.* Extended kinase profile and properties of the protein kinase  
843 inhibitor nilotinib. *Biochimica et biophysica acta* **1804**, 445-453,  
844 doi:10.1016/j.bbapap.2009.11.008 (2010).

- 845 39 Weisberg, E. *et al.* Beneficial effects of combining nilotinib and imatinib in preclinical  
846 models of BCR-ABL+ leukemias. *Blood* **109**, 2112-2120, doi:10.1182/blood-2006-  
847 06-026377 (2007).
- 848 40 Boschelli, D. H. *et al.* Optimization of 4-phenylamino-3-quinolinecarbonitriles as  
849 potent inhibitors of Src kinase activity. *J Med Chem* **44**, 3965-3977,  
850 doi:10.1021/jm0102250 (2001).
- 851 41 Golas, J. M. *et al.* SKI-606, a 4-anilino-3-quinolinecarbonitrile dual inhibitor of Src  
852 and Abl kinases, is a potent antiproliferative agent against chronic myelogenous  
853 leukemia cells in culture and causes regression of K562 xenografts in nude mice.  
854 *Cancer Res* **63**, 375-381 (2003).
- 855 42 Roskoski, R., Jr. Src protein-tyrosine kinase structure, mechanism, and small  
856 molecule inhibitors. *Pharmacol Res* **94**, 9-25, doi:10.1016/j.phrs.2015.01.003 (2015).
- 857 43 Covey, T. *et al.* ACP-196: a novel covalent Bruton's tyrosine kinase (Btk) inhibitor  
858 with improved selectivity and in vivo target coverage in chronic lymphocytic leukemia  
859 (CLL) patients. *Cancer Research* **75**, 2596-2596, doi:10.1158/1538-7445.Am2015-  
860 2596 (2015).
- 861 44 Wu, J., Zhang, M. & Liu, D. Acabrutinib (ACP-196): a selective second-generation  
862 BTK inhibitor. *J Hematol Oncol* **9**, 21, doi:10.1186/s13045-016-0250-9 (2016).
- 863 45 Honigberg, L. A. *et al.* The Bruton tyrosine kinase inhibitor PCI-32765 blocks B-cell  
864 activation and is efficacious in models of autoimmune disease and B-cell  
865 malignancy. *Proc Natl Acad Sci U S A* **107**, 13075-13080,  
866 doi:10.1073/pnas.1004594107 (2010).



- 867 46 Gao, W. *et al.* Selective antitumor activity of ibrutinib in EGFR-mutant non-small cell  
868 lung cancer cells. *J Natl Cancer Inst* **106**, doi:10.1093/jnci/dju204 (2014).
- 869 47 Kang, Y. *et al.* Role of focal adhesion kinase in regulating YB-1-mediated paclitaxel  
870 resistance in ovarian cancer. *J Natl Cancer Inst* **105**, 1485-1495,  
871 doi:10.1093/jnci/djt210 (2013).
- 872 48 Boivin, S., Cusack, S., Ruigrok, R. W. & Hart, D. J. Influenza A virus polymerase:  
873 structural insights into replication and host adaptation mechanisms. *The Journal of*  
874 *biological chemistry* **285**, 28411-28417, doi:10.1074/jbc.R110.117531 (2010).
- 875 49 Baranovich, T. *et al.* T-705 (favipiravir) induces lethal mutagenesis in influenza A  
876 H1N1 viruses in vitro. *Journal of virology* **87**, 3741-3751, doi:10.1128/JVI.02346-12  
877 (2013).
- 878 50 Azzeh, M., Flick, R. & Hobom, G. Functional analysis of the influenza A virus cRNA  
879 promoter and construction of an ambisense transcription system. *Virology* **289**, 400-  
880 410, doi:10.1006/viro.2001.1107 (2001).
- 881 51 Deng, T., Sharps, J. L. & Brownlee, G. G. Role of the influenza virus heterotrimeric  
882 RNA polymerase complex in the initiation of replication. *The Journal of general*  
883 *virology* **87**, 3373-3377, doi:10.1099/vir.0.82199-0 (2006).
- 884 52 Hoffmann, H. H., Palese, P. & Shaw, M. L. Modulation of influenza virus replication  
885 by alteration of sodium ion transport and protein kinase C activity. *Antiviral research*  
886 **80**, 124-134, doi:10.1016/j.antiviral.2008.05.008 (2008).
- 887 53 Roux, P. P. & Blenis, J. ERK and p38 MAPK-Activated Protein Kinases: a Family of  
888 Protein Kinases with Diverse Biological Functions. **68**, 320-344,

- 889        doi:10.1128/MMBR.68.2.320-344.2004 %J Microbiology and Molecular Biology  
890        Reviews (2004).
- 891    54 Arrese, M. & Portela, A. Serine 3 is critical for phosphorylation at the N-terminal end  
892        of the nucleoprotein of influenza virus A/Victoria/3/75. *Journal of virology* **70**, 3385-  
893        3391 (1996).
- 894    55 Hsiang, T. Y., Zhou, L. & Krug, R. M. Roles of the phosphorylation of specific serines  
895        and threonines in the NS1 protein of human influenza A viruses. *J Virol* **86**, 10370-  
896        10376, doi:10.1128/JVI.00732-12 (2012).
- 897    56 Kumar, N., Liang, Y., Parslow, T. G. & Liang, Y. Receptor tyrosine kinase inhibitors  
898        block multiple steps of influenza a virus replication. *J Virol* **85**, 2818-2827,  
899        doi:10.1128/jvi.01969-10 (2011).
- 900    57 Kurokawa, M., Ochiai, H., Nakajima, K. & Niwayama, S. Inhibitory effect of protein  
901        kinase C inhibitor on the replication of influenza type A virus. *J Gen Virol* **71 ( Pt 9)**,  
902        2149-2155, doi:10.1099/0022-1317-71-9-2149 (1990).
- 903    58 Ludwig, S. Targeting cell signalling pathways to fight the flu: towards a paradigm  
904        change in anti-influenza therapy. *The Journal of antimicrobial chemotherapy* **64**, 1-4,  
905        doi:10.1093/jac/dkp161 (2009).
- 906    59 Marjuki, H. *et al.* Influenza A virus-induced early activation of ERK and PI3K  
907        mediates V-ATPase-dependent intracellular pH change required for fusion. *Cellular*  
908        *microbiology* **13**, 587-601, doi:10.1111/j.1462-5822.2010.01556.x (2011).
- 909    60 Planz, O. Development of cellular signaling pathway inhibitors as new antivirals  
910        against influenza. *Antiviral research* **98**, 457-468, doi:10.1016/j.antiviral.2013.04.008  
911        (2013).

- 912 61 Wang, S. *et al.* Tyrosine 132 phosphorylation of influenza A virus M1 protein is  
913 crucial for virus replication by controlling the nuclear import of M1. *Journal of virology*  
914 **87**, 6182-6191, doi:10.1128/JVI.03024-12 (2013).
- 915 62 Xie, J. *et al.* Regulatory roles of c-jun in H5N1 influenza virus replication and host  
916 inflammation. *Biochimica et biophysica acta* **1842**, 2479-2488,  
917 doi:10.1016/j.bbadis.2014.04.017 (2014).
- 918 63 Turrell, L., Hutchinson, E. C., Vreede, F. T. & Fodor, E. Regulation of influenza A  
919 virus nucleoprotein oligomerization by phosphorylation. *J Virol* **89**, 1452-1455,  
920 doi:10.1128/JVI.02332-14 (2015).
- 921 64 York, A., Hutchinson, E. C. & Fodor, E. Interactome analysis of the influenza A virus  
922 transcription/replication machinery identifies protein phosphatase 6 as a cellular  
923 factor required for efficient virus replication. *J Virol* **88**, 13284-13299,  
924 doi:10.1128/JVI.01813-14 (2014).
- 925 65 Hutchinson, E. C. *et al.* Mapping the phosphoproteome of influenza A and B viruses  
926 by mass spectrometry. *PLoS Pathog* **8**, e1002993,  
927 doi:10.1371/journal.ppat.1002993 (2012).
- 928 66 Kirchhoff, J. *et al.* Infection of differentiated airway epithelial cells from caprine lungs  
929 by viruses of the bovine respiratory disease complex. *Vet Microbiol* **170**, 58-64,  
930 doi:10.1016/j.vetmic.2014.01.038 (2014).
- 931 67 Zhang, C., Habets, G. & Bollag, G. Interrogating the kinome. *Nat Biotechnol* **29**, 981-  
932 983, doi:10.1038/nbt.2021 (2011).

- 933 68 Anastassiadis, T., Deacon, S. W., Devarajan, K., Ma, H. & Peterson, J. R.  
934 Comprehensive assay of kinase catalytic activity reveals features of kinase inhibitor  
935 selectivity. *Nat Biotechnol* **29**, 1039-1045, doi:10.1038/nbt.2017 (2011).
- 936 69 Davis, M. I. *et al.* Comprehensive analysis of kinase inhibitor selectivity. *Nat*  
937 *Biotechnol* **29**, 1046-1051, doi:10.1038/nbt.1990 (2011).
- 938 70 Wu, Q. *et al.* Development of small molecule inhibitor-based fluorescent probes for  
939 highly specific super-resolution imaging. *Nanoscale* **12**, 21591-21598,  
940 doi:10.1039/d0nr05188h (2020).
- 941 71 Mohamed, A. J. *et al.* Bruton's tyrosine kinase (Btk): function, regulation, and  
942 transformation with special emphasis on the PH domain. *Immunological Reviews*  
943 **228**, 58-73, doi:<https://doi.org/10.1111/j.1600-065X.2008.00741.x> (2009).
- 944 72 Wang, X., Kokabee, L., Kokabee, M. & Conklin, D. S. Bruton's Tyrosine Kinase and  
945 Its Isoforms in Cancer. *Front Cell Dev Biol* **9**, 668996, doi:10.3389/fcell.2021.668996  
946 (2021).
- 947 73 Davids, M. S. & Brown, J. R. Ibrutinib: a first in class covalent inhibitor of Bruton's  
948 tyrosine kinase. *Future Oncol* **10**, 957-967, doi:10.2217/fon.14.51 (2014).
- 949 74 Byrd, J. C. *et al.* Acalabrutinib (ACP-196) in Relapsed Chronic Lymphocytic  
950 Leukemia. *N Engl J Med* **374**, 323-332, doi:10.1056/NEJMoa1509981 (2016).
- 951 75 Eierhoff, T., Hrinčius, E. R., Rescher, U., Ludwig, S. & Ehrhardt, C. The epidermal  
952 growth factor receptor (EGFR) promotes uptake of influenza A viruses (IAV) into  
953 host cells. *PLoS pathogens* **6**, e1001099-e1001099,  
954 doi:10.1371/journal.ppat.1001099 (2010).

- 955 76 Bjorge, J. D. *et al.* Simultaneous siRNA Targeting of Src and Downstream Signaling  
956 Molecules Inhibit Tumor Formation and Metastasis of a Human Model Breast  
957 Cancer Cell Line. *PLOS ONE* **6**, e19309, doi:10.1371/journal.pone.0019309 (2011).
- 958 77 Bavagnoli, L. *et al.* The PDZ-ligand and Src-homology type 3 domains of epidemic  
959 avian influenza virus NS1 protein modulate human Src kinase activity during viral  
960 infection. *PloS one* **6**, e27789-e27789, doi:10.1371/journal.pone.0027789 (2011).
- 961 78 Hrinčius, E. R. *et al.* Avian influenza viruses inhibit the major cellular signalling  
962 integrator c-Abl. *Cellular microbiology* **16**, 1854-1874, doi:10.1111/cmi.12332 (2014).
- 963 79 Hrinčius, E. R. *et al.* Nonstructural protein 1 (NS1)-mediated inhibition of c-Abl  
964 results in acute lung injury and priming for bacterial co-infections: insights into 1918  
965 H1N1 pandemic? *The Journal of infectious diseases* **211**, 1418-1428,  
966 doi:10.1093/infdis/jiu609 (2015).
- 967 80 Ortiz, M. A. *et al.* Src family kinases, adaptor proteins and the actin cytoskeleton in  
968 epithelial-to-mesenchymal transition. *Cell Commun Signal* **19**, 67,  
969 doi:10.1186/s12964-021-00750-x (2021).
- 970 81 Vultur, A. *et al.* SKI-606 (bosutinib), a novel Src kinase inhibitor, suppresses  
971 migration and invasion of human breast cancer cells. *Mol Cancer Ther* **7**, 1185-  
972 1194, doi:10.1158/1535-7163.MCT-08-0126 (2008).
- 973 82 Hoffmann, H.-H., Palese, P. & Shaw, M. L. Modulation of influenza virus replication  
974 by alteration of sodium ion transport and protein kinase C activity. *Antiviral research*  
975 **80**, 124-134 (2008).
- 976 83 O'Brien, S. *et al.* FAK inhibition with small molecule inhibitor Y15 decreases viability,  
977 clonogenicity, and cell attachment in thyroid cancer cell lines and synergizes with

978 targeted therapeutics. *Oncotarget* **5**, 7945-7959, doi:10.18632/oncotarget.2381  
979 (2014).

980 84 Nimmerjahn, F. *et al.* Active NF-kappaB signalling is a prerequisite for influenza  
981 virus infection. *J Gen Virol* **85**, 2347-2356, doi:10.1099/vir.0.79958-0 (2004).

982 85 Wurzer, W. J. *et al.* Caspase 3 activation is essential for efficient influenza virus  
983 propagation. *EMBO J* **22**, 2717-2728, doi:10.1093/emboj/cdg279 (2003).

984 86 Wurzer, W. J. *et al.* NF-kappaB-dependent induction of tumor necrosis factor-related  
985 apoptosis-inducing ligand (TRAIL) and Fas/FasL is crucial for efficient influenza virus  
986 propagation. *J Biol Chem* **279**, 30931-30937, doi:10.1074/jbc.M403258200 (2004).

987 87 Jia, D. *et al.* Influenza virus non-structural protein 1 (NS1) disrupts interferon  
988 signaling. *PLoS One* **5**, e13927, doi:10.1371/journal.pone.0013927 (2010).

989 88 Bozym, R. A. *et al.* Focal adhesion kinase is a component of antiviral RIG-I-like  
990 receptor signaling. *Cell Host Microbe* **11**, 153-166, doi:10.1016/j.chom.2012.01.008  
991 (2012).

992 89 Chapman, N. M., Connolly, S. F., Reinl, E. L. & Houtman, J. C. Focal adhesion  
993 kinase negatively regulates Lck function downstream of the T cell antigen receptor.  
994 *Journal of immunology* **191**, 6208-6221, doi:10.4049/jimmunol.1301587 (2013).

995 90 St-Pierre, J. & Ostergaard, H. L. A role for the protein tyrosine phosphatase CD45 in  
996 macrophage adhesion through the regulation of paxillin degradation. *PLoS One* **8**,  
997 e71531, doi:10.1371/journal.pone.0071531 (2013).

998 91 Park, S. Y. *et al.* Focal adhesion kinase regulates the localization and retention of  
999 pro-B cells in bone marrow microenvironments. *Journal of immunology* **190**, 1094-  
1000 1102, doi:10.4049/jimmunol.1202639 (2013).

- 1001 92 Ludwig, S. Disruption of virus-host cell interactions and cell signaling pathways as  
1002 an anti-viral approach against influenza virus infections. *Biol Chem* **392**, 837-847,  
1003 doi:10.1515/BC.2011.121 (2011).
- 1004 93 Gaur, P., Munjhal, A. & Lal, S. K. Influenza virus and cell signaling pathways. *Med*  
1005 *Sci Monit* **17**, RA148-154, doi:10.12659/msm.881801 (2011).
- 1006 94 Roca Suarez, A. A., Van Renne, N., Baumert, T. F. & Lupberger, J. Viral  
1007 manipulation of STAT3: Evade, exploit, and injure. *PLoS Pathog* **14**, e1006839,  
1008 doi:10.1371/journal.ppat.1006839 (2018).
- 1009 95 Tsai, M. H., Pai, L. M. & Lee, C. K. Fine-Tuning of Type I Interferon Response by  
1010 STAT3. *Front Immunol* **10**, 1448, doi:10.3389/fimmu.2019.01448 (2019).
- 1011 96 Guo, L., Wang, Q. & Zhang, D. MicroRNA-4485 ameliorates severe influenza  
1012 pneumonia via inhibition of the STAT3/PI3K/AKT signaling pathway. *Oncol Lett* **20**,  
1013 215, doi:10.3892/ol.2020.12078 (2020).
- 1014 97 Hui, K. P. *et al.* Highly pathogenic avian influenza H5N1 virus delays apoptotic  
1015 responses via activation of STAT3. *Sci Rep* **6**, 28593, doi:10.1038/srep28593  
1016 (2016).
- 1017 98 Shi, C. S. & Kehrl, J. H. Pyk2 amplifies epidermal growth factor and c-Src-induced  
1018 Stat3 activation. *J Biol Chem* **279**, 17224-17231, doi:10.1074/jbc.M311875200  
1019 (2004).
- 1020 99 REED, L. J. & MUENCH, H. A SIMPLE METHOD OF ESTIMATING FIFTY PER  
1021 CENT ENDPOINTS<sup>12</sup>. *American Journal of Epidemiology* **27**, 493-497,  
1022 doi:10.1093/oxfordjournals.aje.a118408 (1938).

1023 100 Grishagin, I. V. Automatic cell counting with ImageJ. *Anal Biochem* **473**, 63-65,

1024 doi:10.1016/j.ab.2014.12.007 (2015).

1025

1026



## 1027 **FIGURE LEGENDS**

1028 **Figure 1.** Main target specificity of candidate NRTKIs used in this study.

1029

1030 **Figure 2:** Effect of SMKI treatment on NL09 and NL11 replication at MOI 1. A549 cells  
1031 were infected with pandemic H1N1 strain NL09 and seasonal H3N2 strain NL11 at MOI1  
1032 and incubated for 72h in the presence of SMKI concentrations of 0.25x, 0.5x and 1x with  
1033 1x being the highest non-toxic concentration under infection conditions (Tab. 1). At 24,  
1034 48, and 72 hpi, supernatants were collected and viral titers quantified by TCID<sub>50</sub>/ml assay  
1035 (n = 4). Means ±SD are shown. \*, P<0.05; \*\*, P<0.01; \*\*\*, P<0.001; \*\*\*\*, P<0.0001; ns,  
1036 not significant (P>0.05).

1037

1038 **Figure 3.** NRTKIs effects on cell viability and infectivity during infection. A549 cells were  
1039 infected with pandemic H1N1 strain (NL09) and seasonal H3N2 strain (NL11) (MOI=1)  
1040 and incubated in the presence of SMKIs (0.5x of the highest non-toxic concentration) for  
1041 48h. A) Fluorescence microscopy pictures were captured using a Leica DMI8  
1042 fluorescence microscope (representative field shown from an n=4/condition). Virus-  
1043 infected cells were detected by anti-IAV NP antibody (red), and nuclei were detected  
1044 using NucBlue Live ReadyProbes (blue). B) Heatmap visualization of NRTKIs affect cell  
1045 viability (blue/green) and infectivity (red) relative to untreated infection in A549 cells.  
1046 Images were quantified using ImageJ software suite. Data is based all fields represented  
1047 in (A) (n=4/condition).

1048

1049 **Figure 4.** MOI-independent effect of NRTKIs on IAV infection. A549 cells were infected  
1050 with pandemic H1N1 strain (NL09) and seasonal H3N2 strain (NL11) at either (MOI=0.1  
1051 or 3) and incubated for 72h in the presence of NRTKIs at 0.25x (gray) and 0.5x (white) of  
1052 highest-toxic concentrations. At 24, 48, and 72 hpi, supernatants were collected and viral  
1053 titers quantified by TCID<sub>50</sub>/ml assay (n=4). Means ±SD are shown. \*, P<0.05; \*\*, P<0.01;  
1054 \*\*\*, P<0.001; \*\*\*\*, P<0.0001; ns, not significant (P>0.05).

1055  
1056 **Figure 5.** Effect of NRTKI treatment on *ex vivo* IAV infection. A) hPCLS were infected  
1057 with pandemic H1N1 strain (NL09) and seasonal H3N2 strain (NL11) at increasing doses  
1058 (10<sup>4</sup>, 10<sup>5</sup> and 10<sup>6</sup> TCID<sub>50</sub>/200 ul). At 2, 16, 24, 48, 72, 96, and 144 hpi culture supernatants  
1059 were sampled and viral titers quantified by TCID<sub>50</sub>/ml assay. The supernatants were  
1060 replenished after collection at every time point (8 donors; n=24/virus); means ±SEM are  
1061 shown. B) Heatmap visualization of NRTKI cytotoxicity based on LDH release of hPCLS  
1062 normalized to DMSO control, and relative to 1% Triton-X 100 treated cells; NRTKIs were  
1063 treated with 1x and 10x of highest cytotoxic concentration on A549 cells (Fig. 1) for up to  
1064 144h. At every time point, LDH release was determined using LDH-Glo Cell Viability  
1065 Assay (8 donors / n=24). C) PCLS were infected with NL09 or NL11 (10<sup>5</sup> TCID<sub>50</sub> / 200 ul)  
1066 and incubated for 120h in the presence of NRTKIs (Defactinib 50uM; Acalabrutinib 5uM;  
1067 Ibrutinib 5uM; Bosutinib 5uM; Nilotinib 10uM; Saracatinib 0.125uM). Growth curves from  
1068 supernatants collected at 2, 12, 24, 48, 72, and 120 hpi were quantified by TCID<sub>50</sub>/ml  
1069 assay (3 donors; n=6/condition); means ±SEM are shown. D) NL11 infected hPCLS were  
1070 fixed 120 hpi and the PFA-fixed paraffin-embedded (PFPE) PCLS were were cut into 2  
1071 μm thick section. Shown is H&E staining and viral anti-NP immunohistochemical staining

1072 (brown). Original magnification 10x. E) Semi-quantitative analysis of virus infected (anti-  
1073 NP staining) was performed for all tested NRTKIs using FIJI image-analysis software  
1074 platform and normalized to whole section areas.

1075

1076 **Figure 6.** Stability of NRTKI treatment effect. (A) Effect of SMKI treatment on NL09 and  
1077 NL11 replication at MOI=0.001 over serial passages was determined by growth curves  
1078 using MDCK cells infected with pandemic H1N1 strain (NL09) or seasonal H3N2 strain  
1079 (NL11) at MOI=0.001 and incubated for 72h in the presence of the highest non-toxic  
1080 NRTKI concentrations (n=2). At 72 hpi, samples were collected, and viral titers were  
1081 assessed by TCID<sub>50</sub>/ml assay on MDCK cells (n = 4). MDCK cells were infected as before  
1082 at MOI=0.001 according to the assessed viral titers. Means ±SD are shown. (B) NL09  
1083 and NL11 virus stocks were pre-incubated with control (DMSO) or the 1x concentration  
1084 of the respective NRTKI for 4h at 37°C. A549 cells were then infected using a 1:1000  
1085 dilution of the NRTKI pre-incubated virus stocks and incubated for 72h. At 72 hpi, samples  
1086 were collected, and viral titers were assessed by TCID<sub>50</sub>/ml assay (n=3). Means ±SD are  
1087 shown. \*, P<0.05; \*\*, P<0.01; \*\*\*, P<0.001; \*\*\*\*, P<0.0001; ns, not significant (P>0.05).

1088

1089 **Figure 7.** The effect of NRTKI on viral entry. A549 cells were pretreated with NRTKIs for  
1090 2h and then infected with the NL09 and NL11 strains (MOI=10) for 0.5h in the presence  
1091 or absence of the inhibitors. The cells were fixed and permeabilized. Virions were  
1092 detected by anti-NP (green) antibody, F-Actin was detected by ActinRed-555 (red), and  
1093 nuclei were detected using NucBlue Live ReadyProbes (blue). and virion localization was  
1094 assessed by confocal microscopy using a 63x oil immersion objective (n = 2).

1095

1096 **Figure 8.** NRTKIs effects on IAV RNA replication. (A) A549 cells were transfected with  
1097 pPOLI-358-FFluc and pmaxGFP plasmids. At 24 hpt, cells were either infected with NL09  
1098 or NL11 at MOI=1 in the presence or absence of indicated NRTKIs. At 48 hpt (24 hpi),  
1099 luciferase activity was measured and normalized to GFP expression (MFI). (B) A549 cells  
1100 were transfected with pPOLI-358-FFluc and pmaxGFP plasmids and co-transfected with  
1101 either NL09 or NL03-minigenome plasmids. At 6 hpt, the indicated NRTKIs were added  
1102 to the medium. At 30 hpt (24 h of treatment), luciferase activity was measured and  
1103 normalized to GFP MFI. Bars indicate values relative to infected untreated cells  
1104 normalized to GFP. For each system luminescence of untreated infected A549 cells  
1105 relative to GFP displays the replication kinetics of the respective polymerase complex. All  
1106 measurements were taken in triplicates from triplicate samples (n=3). Error bars indicate  
1107  $\pm$  standard deviation (SD). \*, P<0.05; \*\*, P<0.01; \*\*\*, P<0.001; \*\*\*\*, P<0.0001; ns, not  
1108 significant (P>0.05). P-values determined by Brown-Forsythe and Welsh ANOVA  
1109 compared to untreated.

1110

1111 **Figure 9.** Effect of NRTKIs treatment on STAT3 activation. A549 cells were infected with  
1112 NL09 (A) or NL11 (B) at MOI=1. Total proteins were isolated from whole cell lysate at 18  
1113 and 48 hpi and immunoblot assay was performed for phospho- and total STAT3, IAV-NP  
1114 and bActin. Chemiluminescence was detected and quantified using the Li-Cor C-DiGit  
1115 and Image Studio 5.1 CLX software. All measurements were taken from two western blots  
1116 from two independent experiments (n=2). All values are relative to untreated virus-  
1117 infected cells. P=phosphor, T=total. Error bars indicate  $\pm$  standard deviation (SD). \*,

1118 P<0.05; \*\*, P<0.01; \*\*\*, P<0.001; \*\*\*\*, P<0.0001; ns, not significant (P>0.05). P-values  
1119 determined by students t-test compared to untreated virus-infected cells.

1120

1121 **Figure 10.** Effect of NRTKIs on NFkB activation. A549 cells were infected with NL09 (A)  
1122 or NL11 (B) at MOI=1. Protein was isolated from whole cell lysate at 18 and 48 hpi and  
1123 immunoblot assay was performed for pNFkB p65, panNFkB p65, IAV NP and bActin.  
1124 Detected signal was quantified using the Li-Cor C-DiGit and Image Studio 5.1 CLX  
1125 software. (C) NL09, NL11 or mock infected cells were treated with poly(IC) at  
1126 concentrations of 50 ng/ml and 200 ng/ml. Total proteins were isolated from whole cell  
1127 lysate at 18 and 48 hpi and immunoblot assay was performed for phospho- and total  
1128 NFkBp65, IAV NP and bActin. All measurements were taken from two western blots from  
1129 two independent experiments (n=2). All values are normalized to bActin and relative to  
1130 untreated of the respective time-point. Error bars indicate  $\pm$  standard deviation (SD).  
1131 P=phosphorylated and T=total. \*, P<0.05; \*\*, P<0.01; \*\*\*, P<0.001; \*\*\*\*, P<0.0001; ns,  
1132 not significant (P>0.05). P-values determined by students t-test compared to untreated  
1133 virus infected cells.

1134

**Table 1. Main targets of FDA-approved NRTKIs used**

| NRTKIs                          | Main target   | 1x dose (μM) | FDA approved conc. (μM)* | Reference(s) |
|---------------------------------|---------------|--------------|--------------------------|--------------|
| <b>Defactinib (VS-6063)</b>     | FAK, Pyk2     | 5            | 1.26**                   | [47]         |
| <b>Acalabrutinib (ACP-196)</b>  | Btk           | 0.5          | 0.69                     | [43, 44]     |
| <b>Ibrutinib (PCI-32765)</b>    | Btk, EGFR     | 0.5          | 2.05                     | [45, 46]     |
| <b>Bosutinib (SKI-606)</b>      | Abl, Src, Btk | 5            | 1.82                     | [40, 41]     |
| <b>Nilotinib (AMN-107)</b>      | Abl, PDGFRα   | 1            | 2.44                     | [38, 39]     |
| <b>Saracatinib (AZD0530)</b>    | Src           | 0.125        | 0.37                     | [42]         |
| <b>Ruxolitinib (INCB018424)</b> | JAK1/2        | 5            | 0.21                     | [37]         |
| <b>Tofacitinib (CP-690550)</b>  | JAK1/2/3      | 10           | 0.1                      | [36]         |

\* FDA approved concentrations calculated from orally administered dosage per 24h based on average adult person's weight according to WHO (62.0kg).

\*\* Defactinib FDA-approved concentration based on dosage information of orphan drug clinical studies.

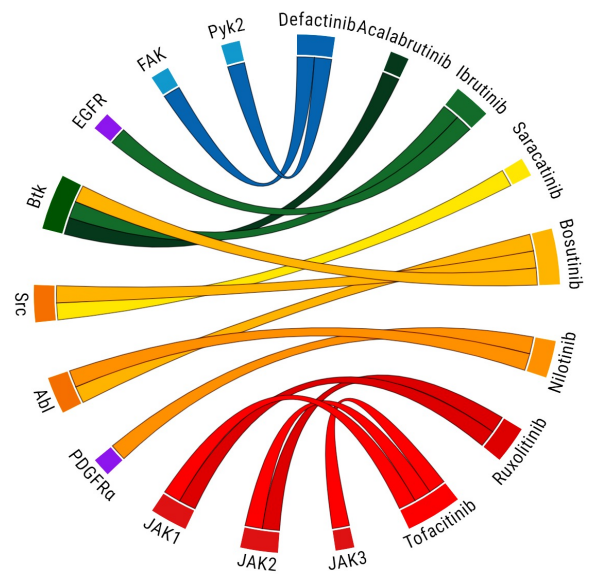

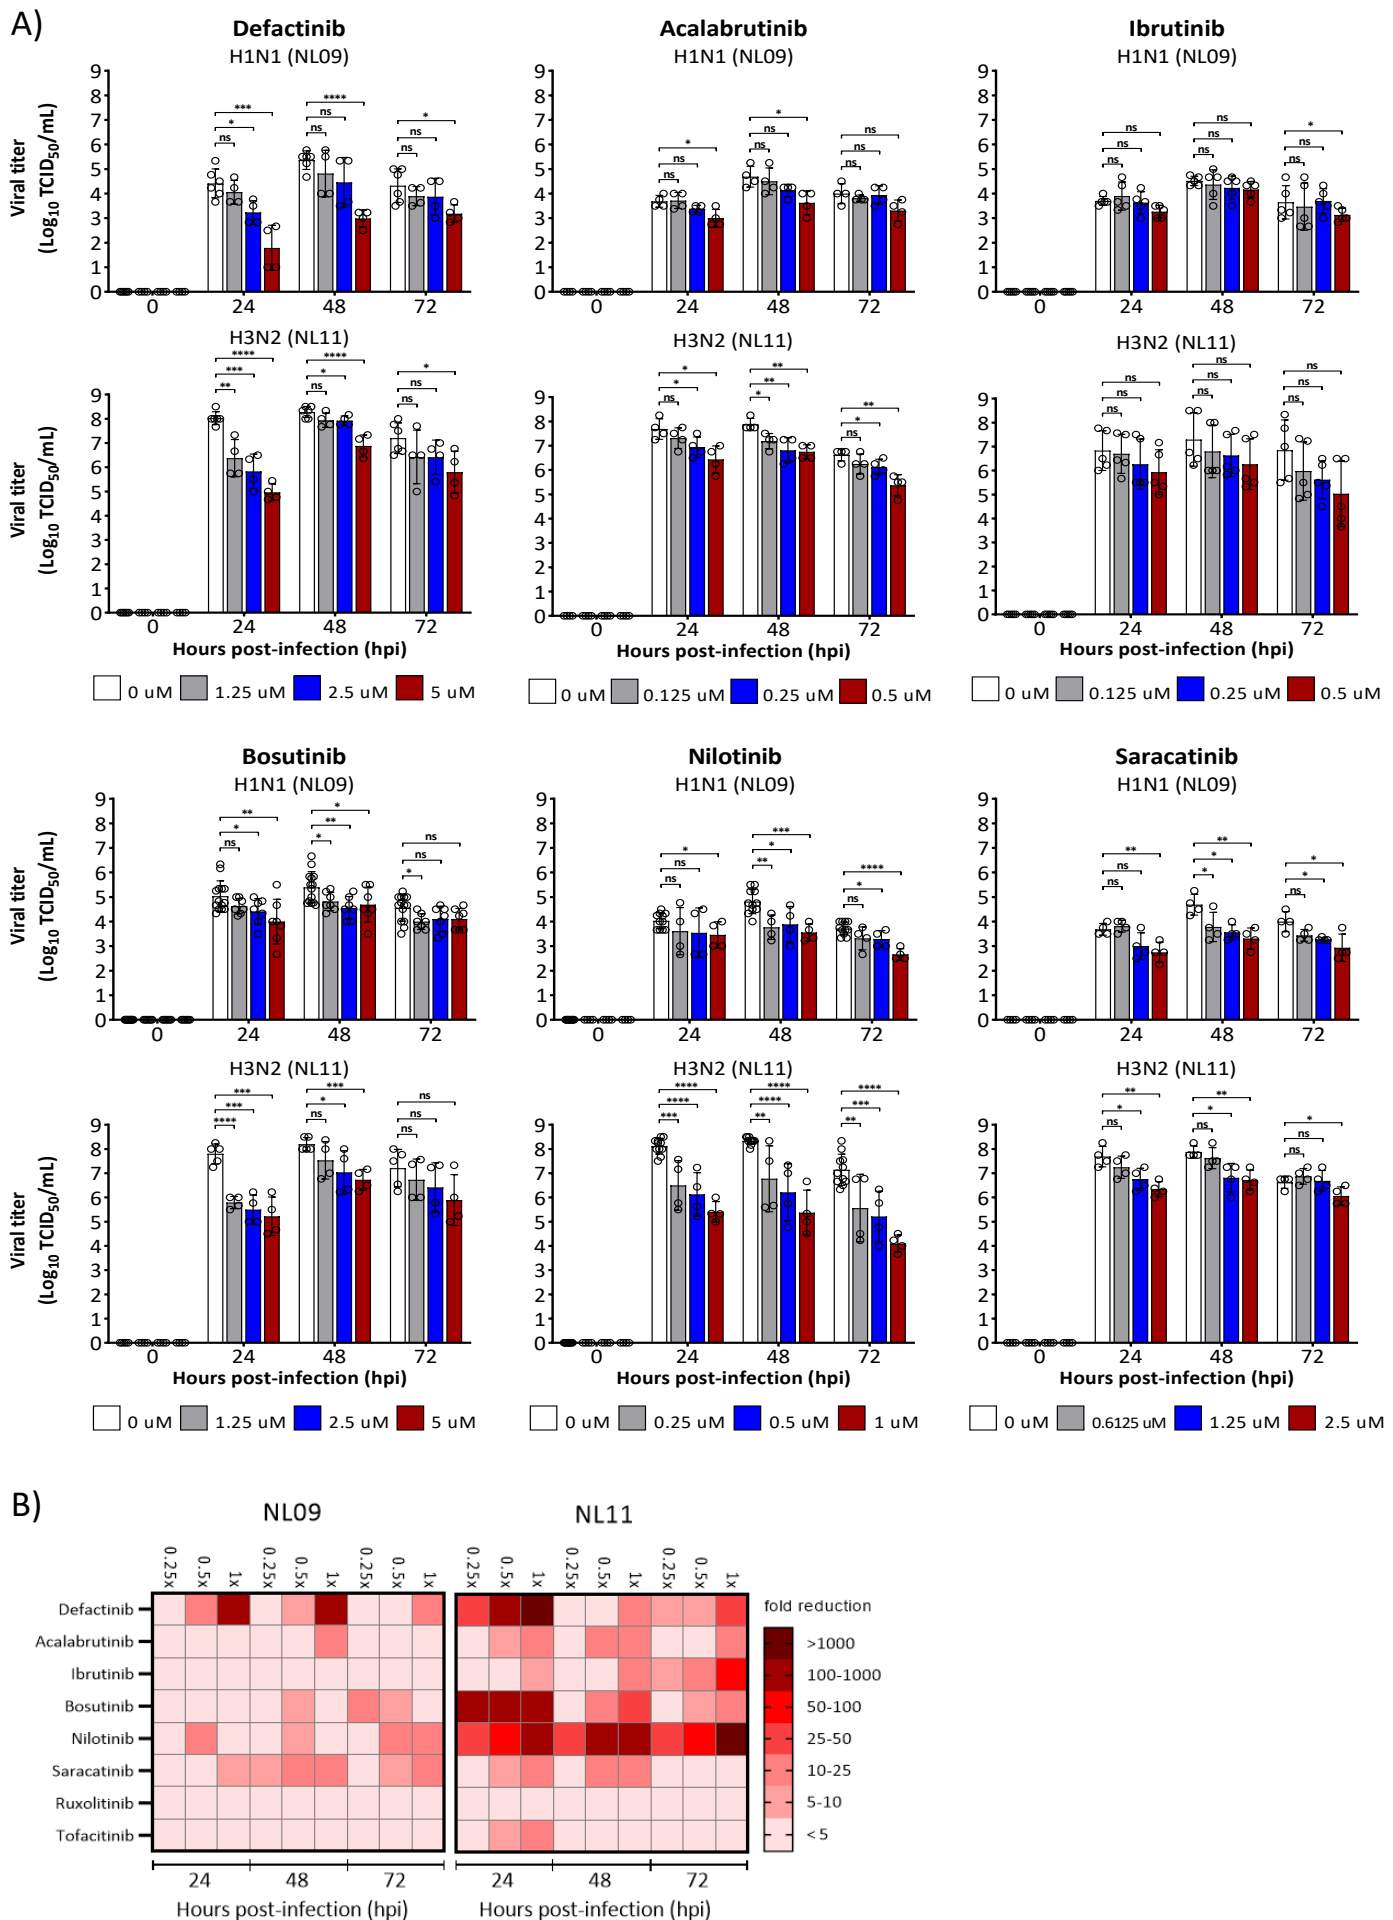

**Figure 2**

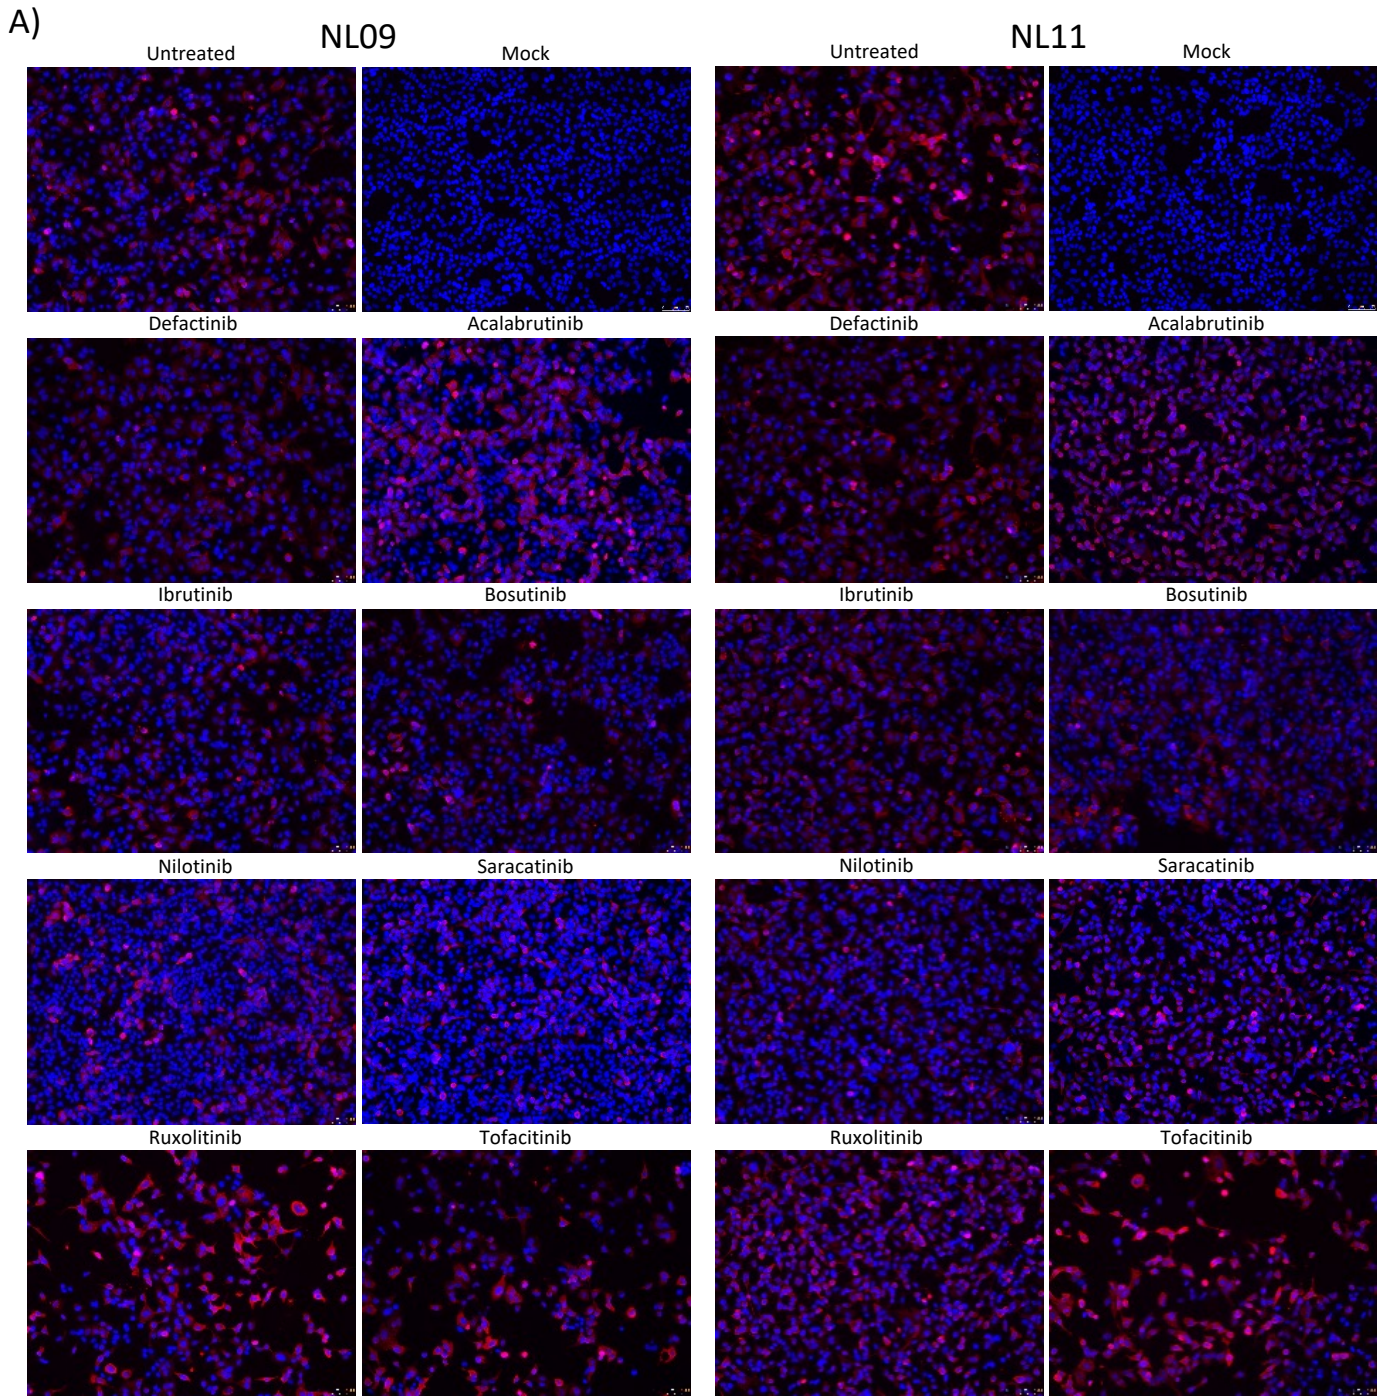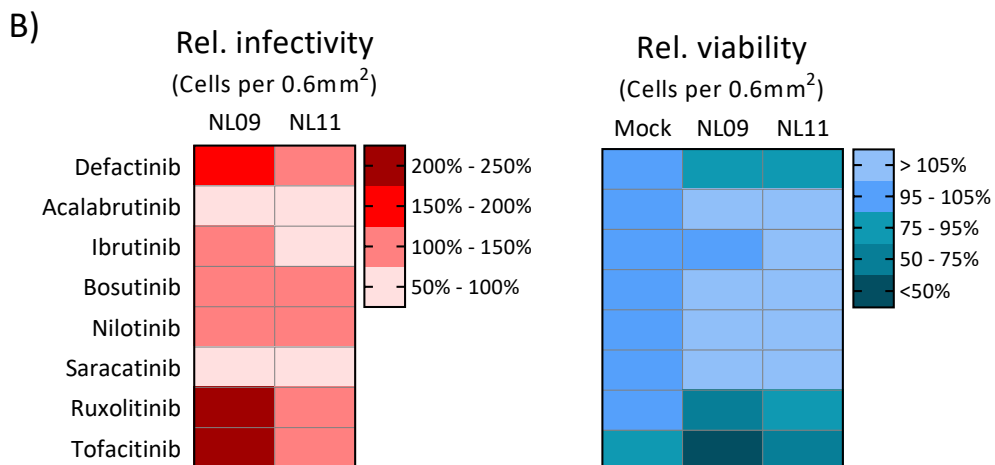

Figure 3



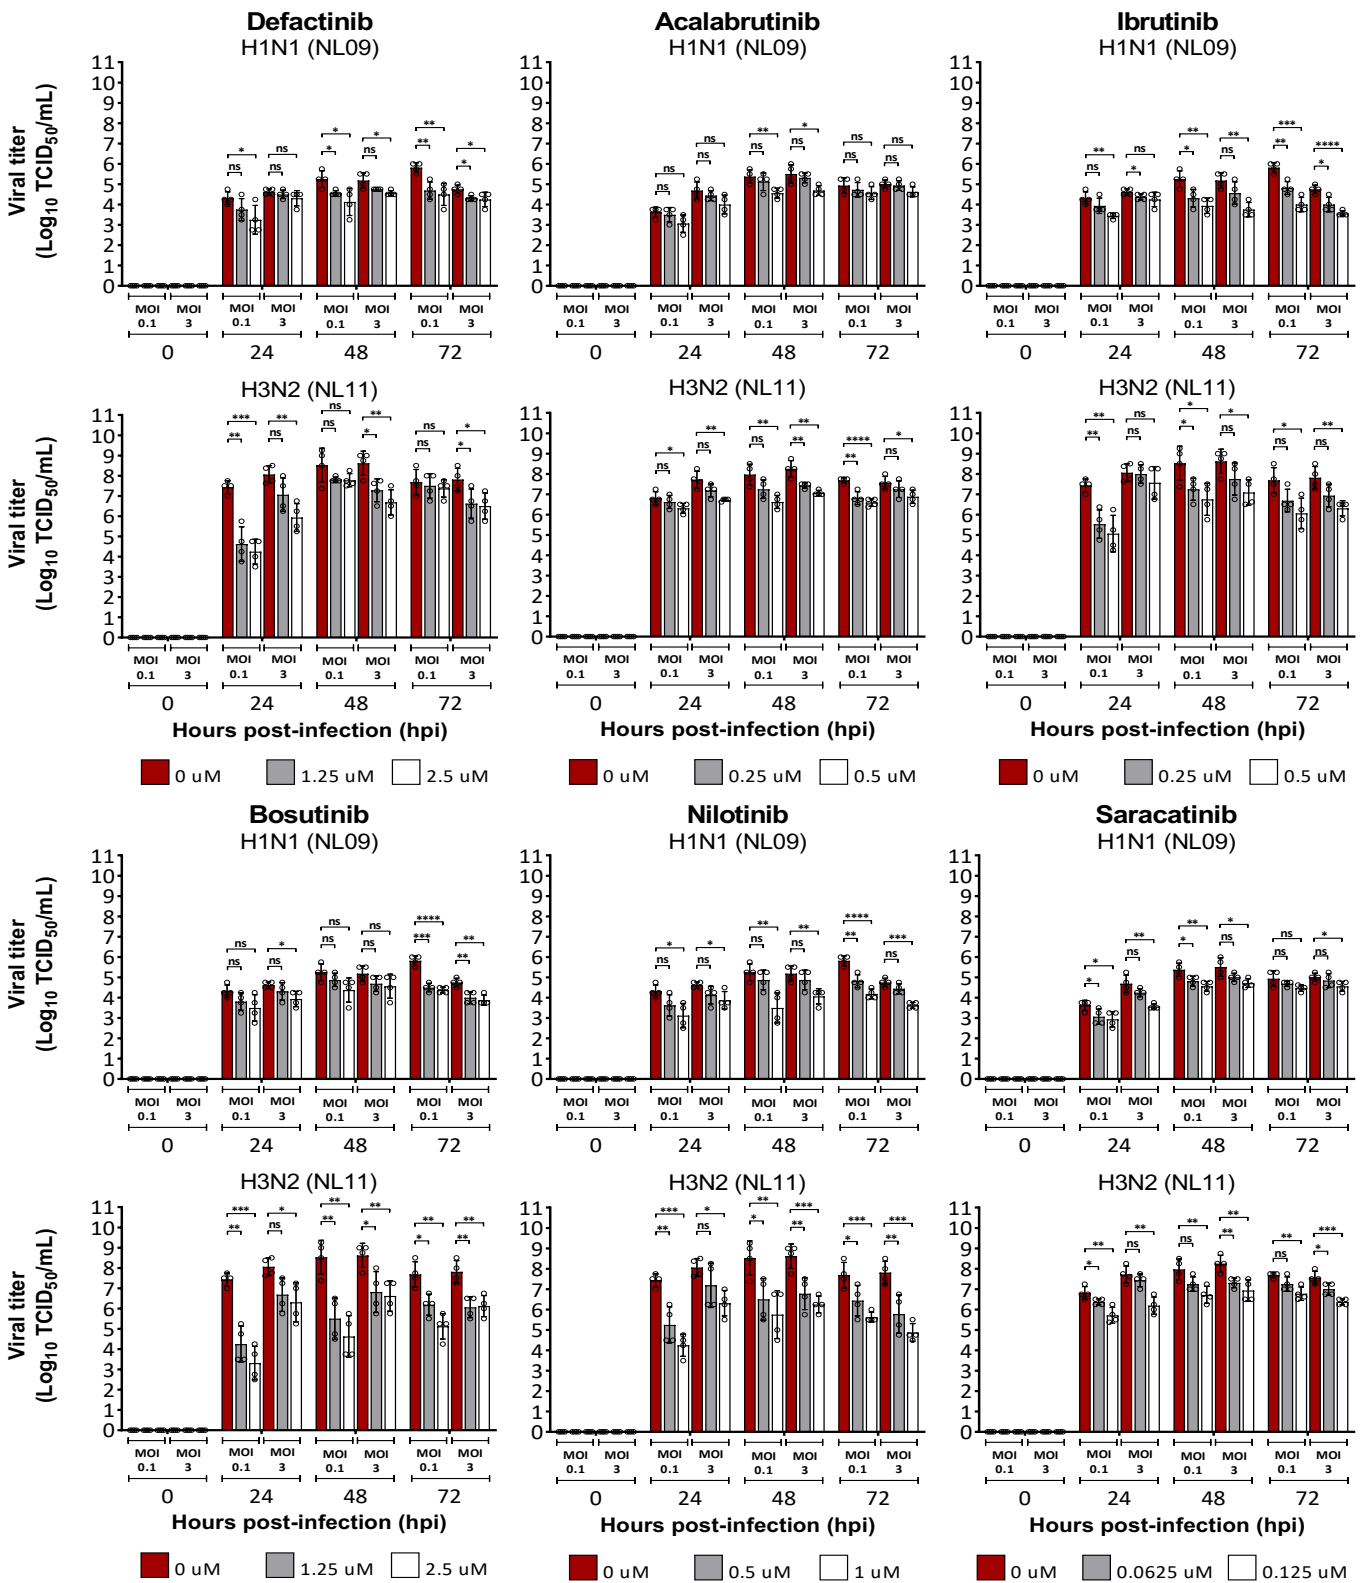

Figure 4

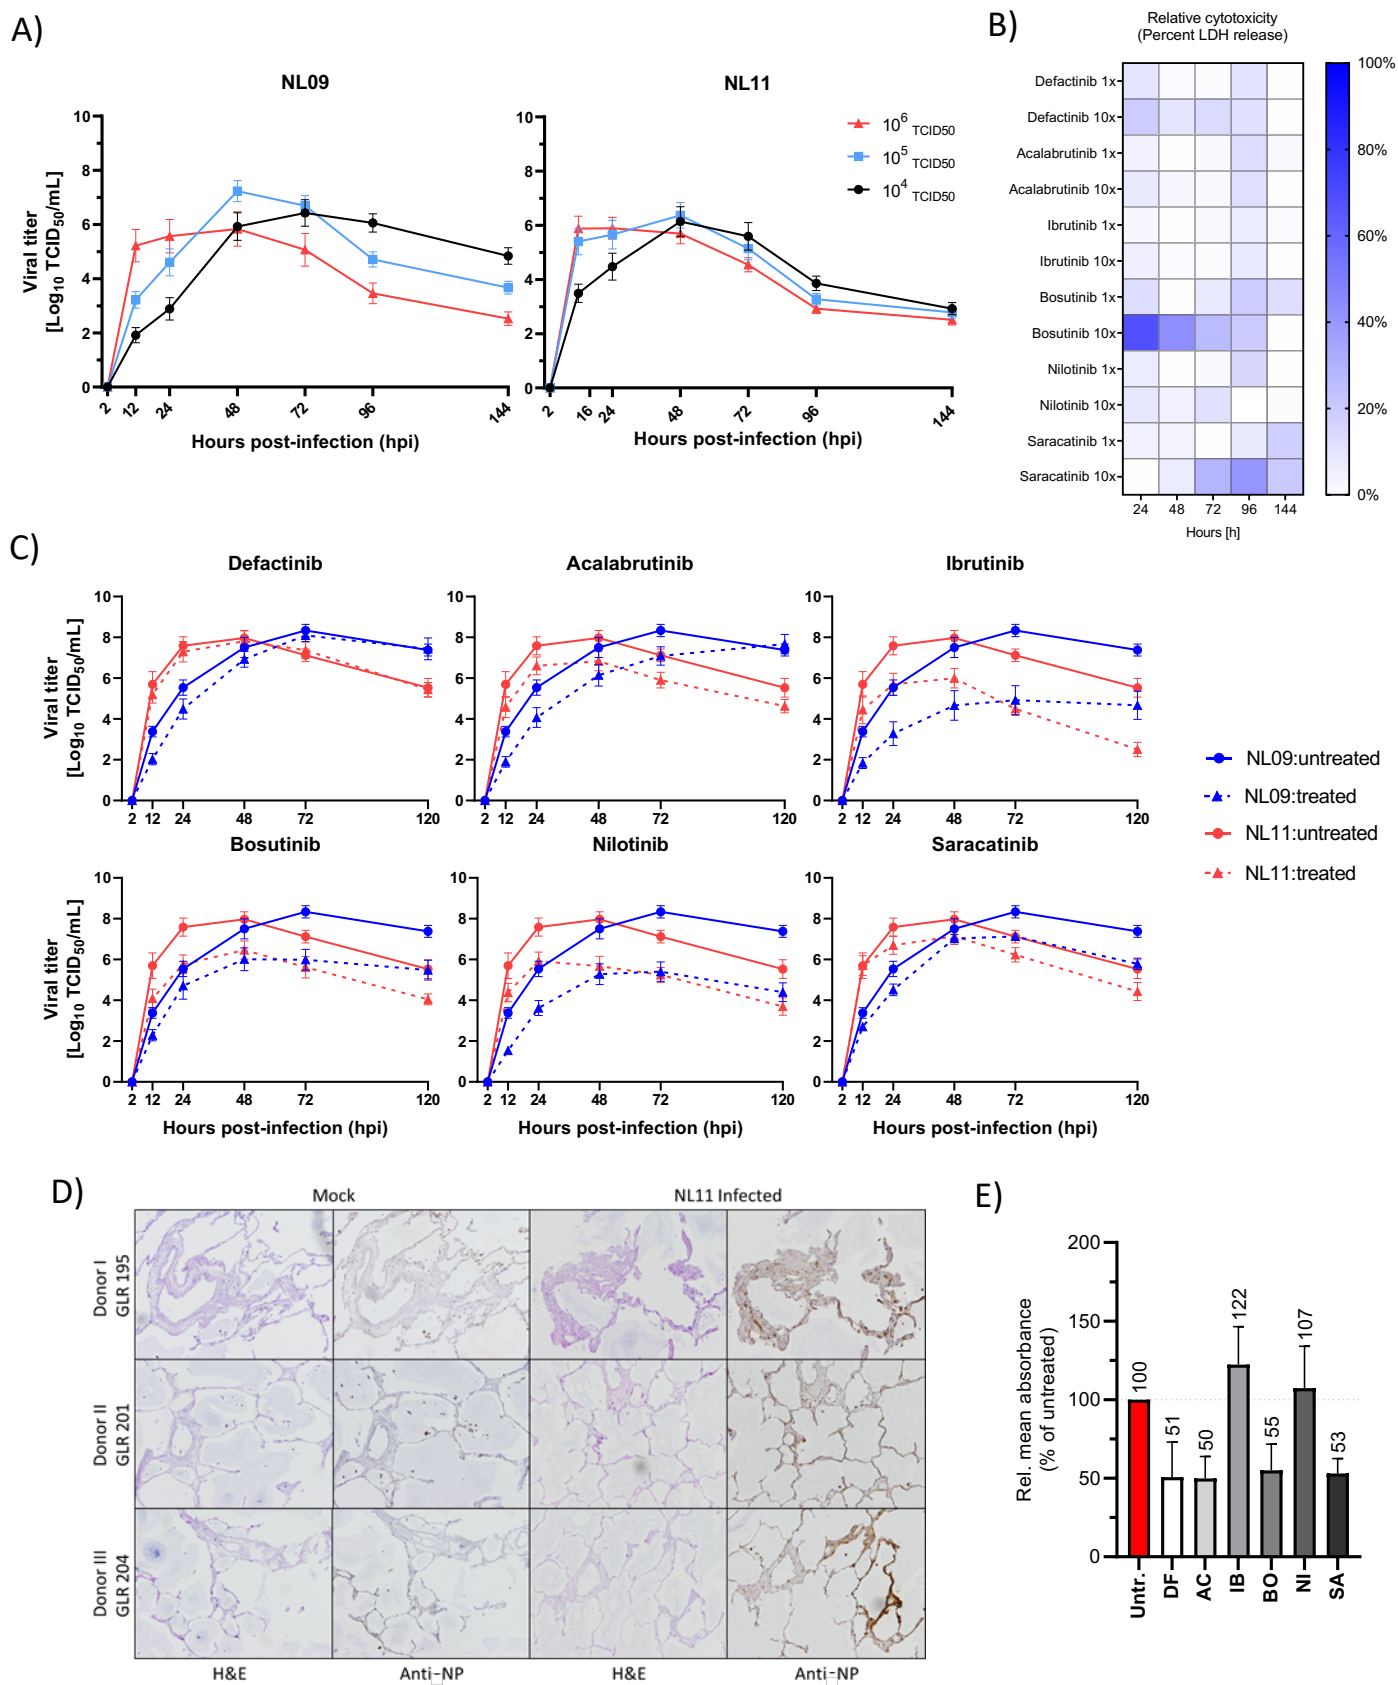

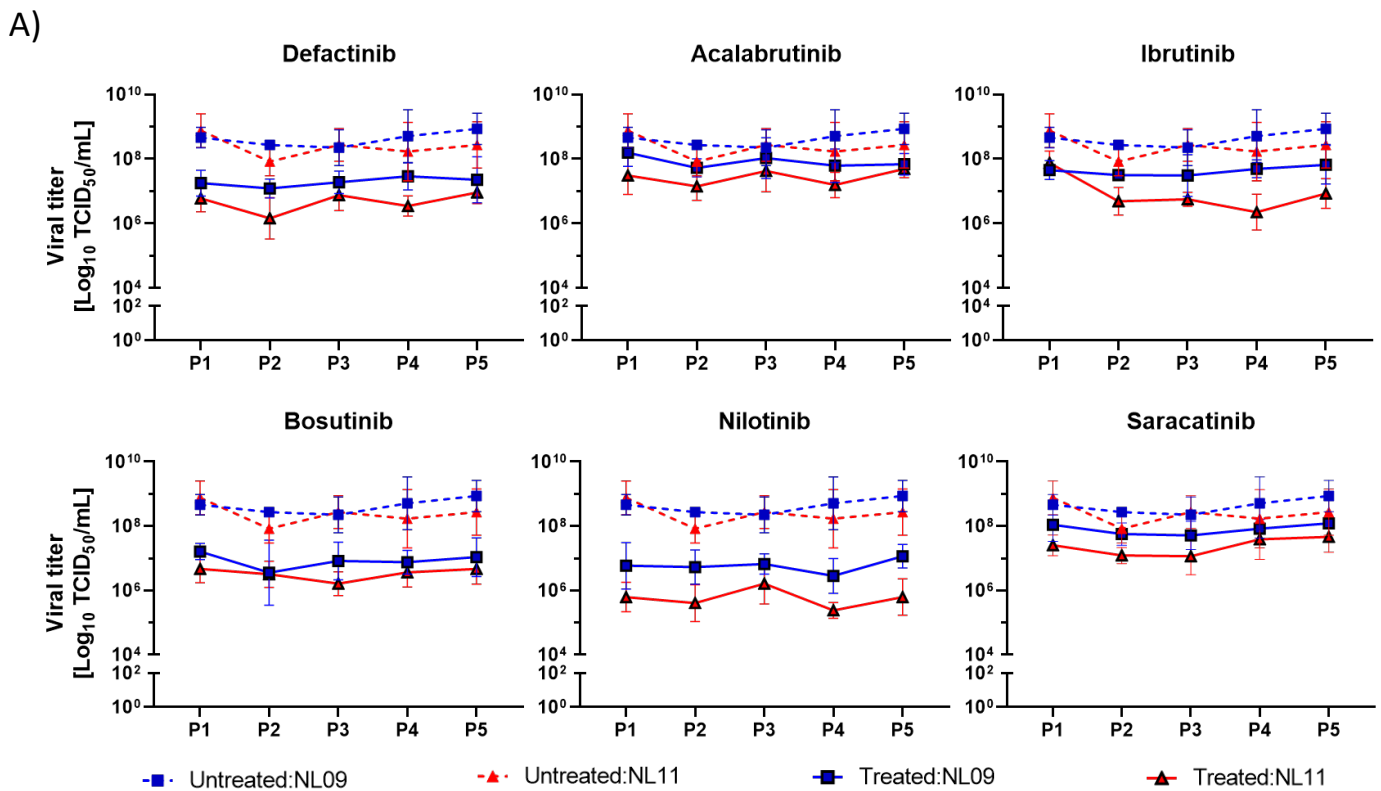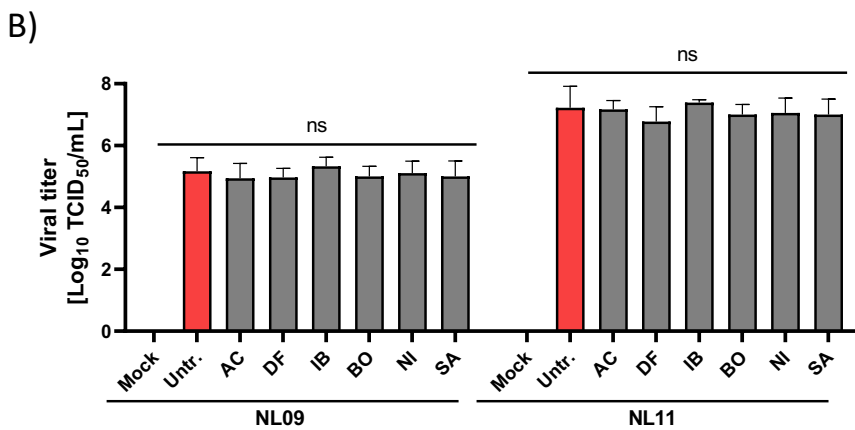

Figure 6

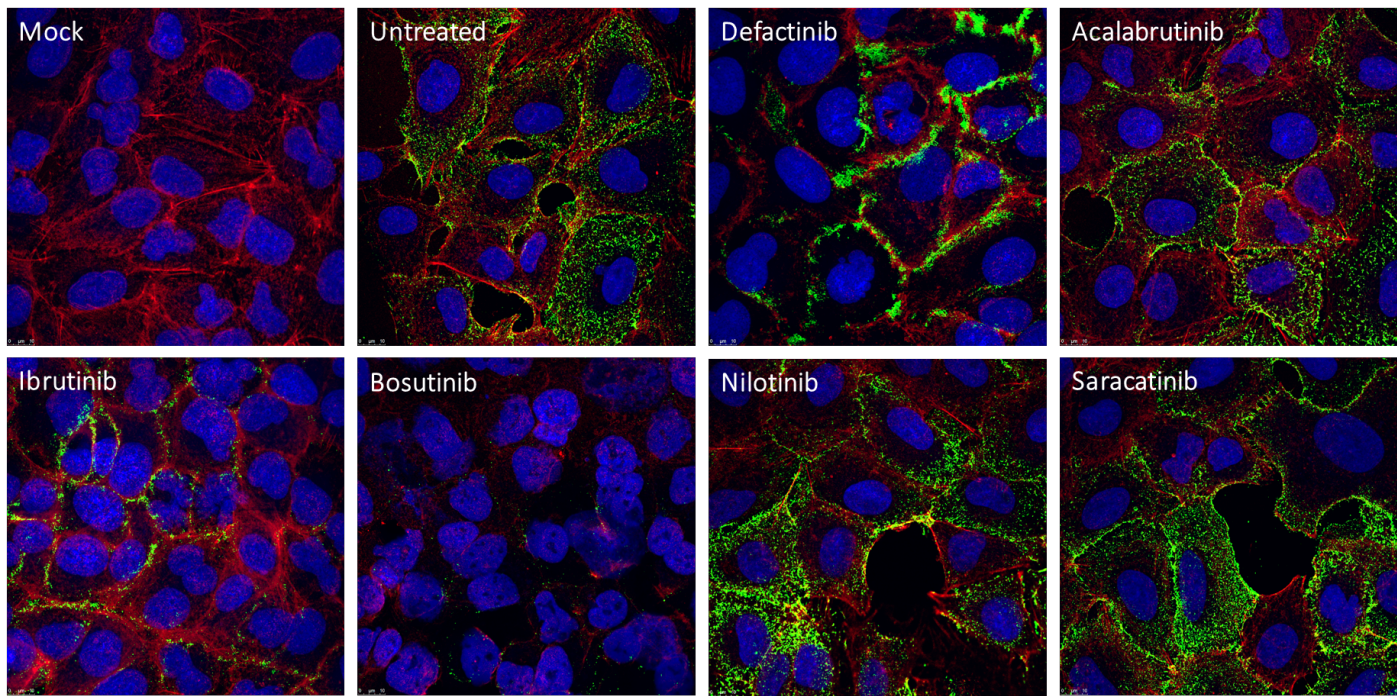

**Figure 7**

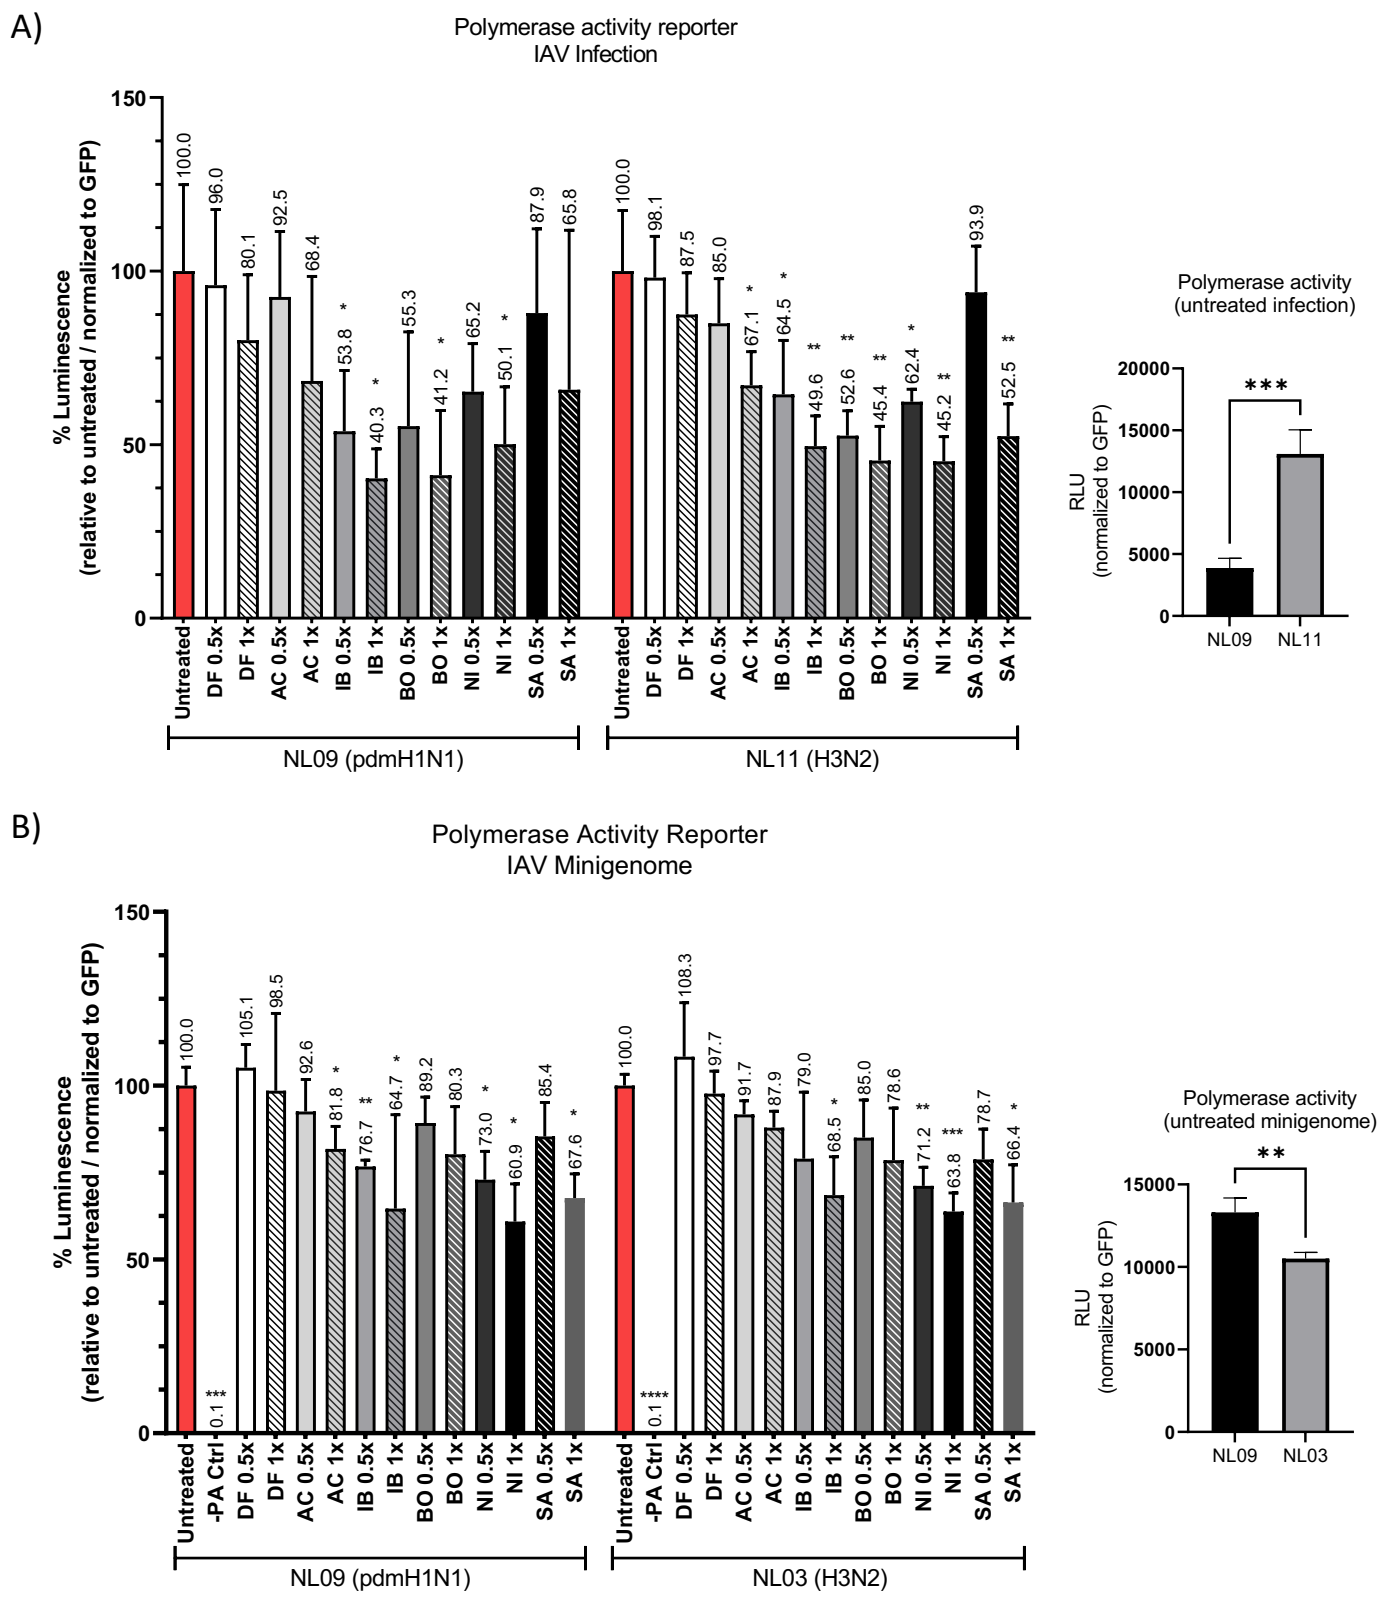

**Figure 8**

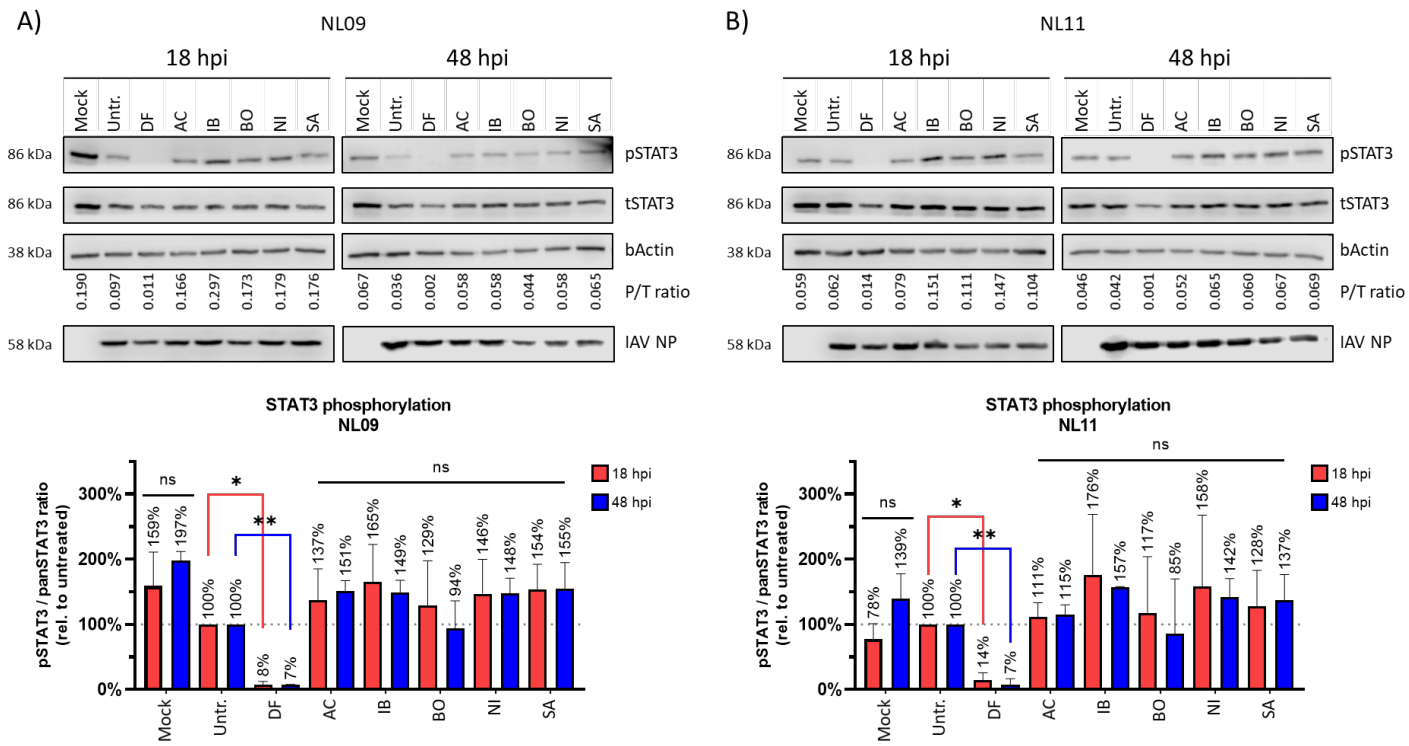

**Figure 9**

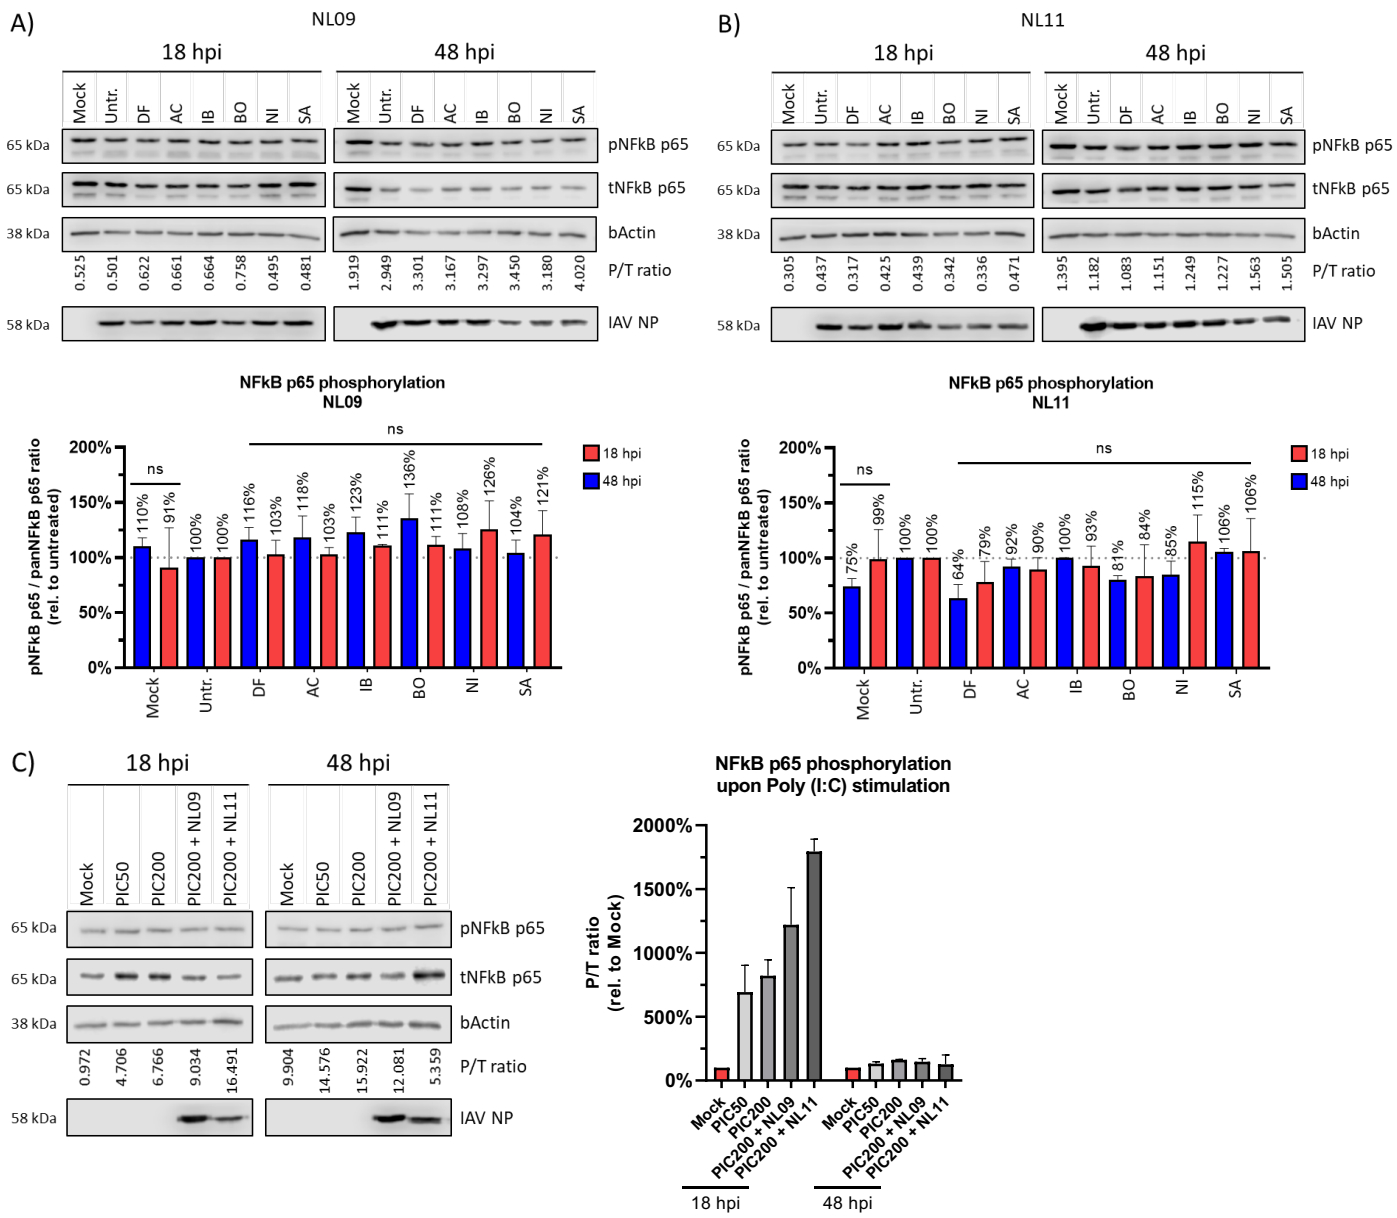

Figure 10
